# Supplementary material for: Synthesis, properties and evaluation of biological activity of herbicidal ionic liquids with 4-(4-chloro-2-methylphenoxy)butanoate anion
Source: Royal Society of Chemistry journal article supplement (doi:10.1039/c5ra23997d), 2016-01-01
Supplement: c5ra23997d1.pdf [file c5ra23997d1.pdf]

## ELECTRONIC SUPPORTING INFORMATION

### **Synthesis, properties and evaluation of biological activity of herbicidal ionic liquids with 4-(4-chloro-2-methylphenoxy)butanoate anion**

Juliusz Pernak<sup>a</sup>, Michał Niemczak<sup>a</sup>, Katarzyna Materna<sup>a</sup>,  
Krzysztof Żelechowski<sup>b</sup>, Katarzyna Marcinkowska<sup>c</sup>, Tadeusz Praczyk<sup>c</sup>

<sup>a</sup>Department of Chemical Technology, Poznan University of Technology, Poznan 60-965,  
Poland

<sup>b</sup>Institute of Industrial Organic Chemistry, 03-236 Warszawa, Poland

<sup>c</sup>Institute of Plant Protection - National Research Institute, Poznan 60-318, Poland

*1-Ethyl-1-methylpiperidinium 4-(4-chloro-2-methylphenoxy)butanoate (1)*

Elemental analysis calculated for C<sub>19</sub>H<sub>30</sub>ClNO<sub>3</sub> (M<sub>mol</sub> = 355.90 g mol<sup>-1</sup>) (%): C = 64.12, H = 8.50, N = 3.94; found: C = 64.33, H = 8.78, N = 3.70.

*1-Methyl-1-propylpiperidinium 4-(4-chloro-2-methylphenoxy)butanoate (2)*

Elemental analysis calculated for C<sub>20</sub>H<sub>32</sub>ClNO<sub>3</sub> (M<sub>mol</sub> = 369.93 g mol<sup>-1</sup>) (%): C = 64.94, H = 8.72, N = 3.79; found: C = 64.85, H = 8.89, N = 3.53.

*1-Butyl-1-methylpiperidinium 4-(4-chloro-2-methylphenoxy)butanoate (3)*

Elemental analysis calculated for C<sub>21</sub>H<sub>34</sub>ClNO<sub>3</sub> (M<sub>mol</sub> = 383.95 g mol<sup>-1</sup>) (%): C = 65.69, H = 8.93, N = 3.65; found: C = 65.49, H = 8.71, N = 3.53.

*1-Methyl-1-pentylpiperidinium 4-(4-chloro-2-methylphenoxy)butanoate (4)*

Elemental analysis calculated for C<sub>22</sub>H<sub>36</sub>ClNO<sub>3</sub> (M<sub>mol</sub> = 397.98 g mol<sup>-1</sup>) (%): C = 66.39, H = 9.12, N = 3.52; found: C = 66.79, H = 8.88, N = 3.74.

*1-Hexyl-1-methylpiperidinium 4-(4-chloro-2-methylphenoxy)butanoate (5)*

Elemental analysis calculated for C<sub>23</sub>H<sub>38</sub>ClNO<sub>3</sub> (M<sub>mol</sub> = 412.01 g mol<sup>-1</sup>) (%): C = 67.05, H = 9.30, N = 3.40; found: C = 66.75, H = 9.04, N = 3.62.

*1-Heptyl-1-methylpiperidinium 4-(4-chloro-2-methylphenoxy)butanoate (6)*

Elemental analysis calculated for C<sub>24</sub>H<sub>40</sub>ClNO<sub>3</sub> (M<sub>mol</sub> = 426.03 g mol<sup>-1</sup>) (%): C = 67.66, H = 9.46, N = 3.29; found: C = 67.91, H = 9.12, N = 3.53.

*1-Methyl-1-octylpiperidinium 4-(4-chloro-2-methylphenoxy)butanoate (7)*

Elemental analysis calculated for C<sub>25</sub>H<sub>42</sub>ClNO<sub>3</sub> (M<sub>mol</sub> = 440.06 g mol<sup>-1</sup>) (%): C = 68.23, H = 9.62, N = 3.18; found: C = 67.99, H = 9.48, N = 3.45.

*1-Methyl-1-nonylpiperidinium 4-(4-chloro-2-methylphenoxy)butanoate (8)*

Elemental analysis calculated for C<sub>26</sub>H<sub>44</sub>ClNO<sub>3</sub> (M<sub>mol</sub> = 454.09 g mol<sup>-1</sup>) (%): C = 68.77, H = 9.77, N = 3.08; found: C = 68.43, H = 9.60, N = 3.23.

*1-Decyl-1-methylpiperidinium 4-(4-chloro-2-methylphenoxy)butanoate (9)*

Elemental analysis calculated for  $C_{27}H_{46}ClNO_3$  ( $M_{mol} = 468.11 \text{ g mol}^{-1}$ ) (%): C = 69.28, H = 9.90, N = 2.99; found: C = 69.05, H = 9.68, N = 3.21.

*1-Methyl-1-undecylpiperidinium 4-(4-chloro-2-methylphenoxy)butanoate (10)*

Elemental analysis calculated for  $C_{28}H_{48}ClNO_3$  ( $M_{mol} = 482.14 \text{ g mol}^{-1}$ ) (%): C = 69.75, H = 10.03, N = 2.91; found: C = 69.98, H = 10.35, N = 3.30.

*1-Dodecyl-1-methylpiperidinium 4-(4-chloro-2-methylphenoxy)butanoate (11)*

Elemental analysis calculated for  $C_{29}H_{50}ClNO_3$  ( $M_{mol} = 496.17 \text{ g mol}^{-1}$ ) (%): C = 70.20, H = 10.16, N = 2.82; found: C = 69.99, H = 9.88, N = 3.03.

*1-Methyl-1-tetradecylpiperidinium 4-(4-chloro-2-methylphenoxy)butanoate (12)*

Elemental analysis calculated for  $C_{31}H_{54}ClNO_3$  ( $M_{mol} = 524.22 \text{ g mol}^{-1}$ ) (%): C = 71.03, H = 10.38, N = 2.67; found: C = 71.24, H = 10.13, N = 2.91.

*1-Hexadecyl-1-methylpiperidinium 4-(4-chloro-2-methylphenoxy)butanoate (13)*

Elemental analysis calculated for  $C_{33}H_{58}ClNO_3$  ( $M_{mol} = 552.27 \text{ g mol}^{-1}$ ) (%): C = 71.77, H = 10.59, N = 2.54; found: C = 71.51, H = 10.37, N = 2.82.

*1-Methyl-1-octadecylpiperidinium 4-(4-chloro-2-methylphenoxy)butanoate (14)*

Elemental analysis calculated for  $C_{35}H_{62}ClNO_3$  ( $M_{mol} = 580.32 \text{ g mol}^{-1}$ ) (%): C = 72.44, H = 10.77, N = 2.41; found: C = 72.59, H = 10.93, N = 2.61.

The following abbreviations were used to explain the multiplicities:

s = singlet, d = doublet, t = triplet, q = quartet, m = multiplet, quin = quintuplet, sext = sextet, sep = septet.

Figure S1. <sup>1</sup>H NMR spectrum of 1-ethyl-1-methylpiperidinium 4-(4-chloro-2-methylphenoxy)butanoate (**1**).

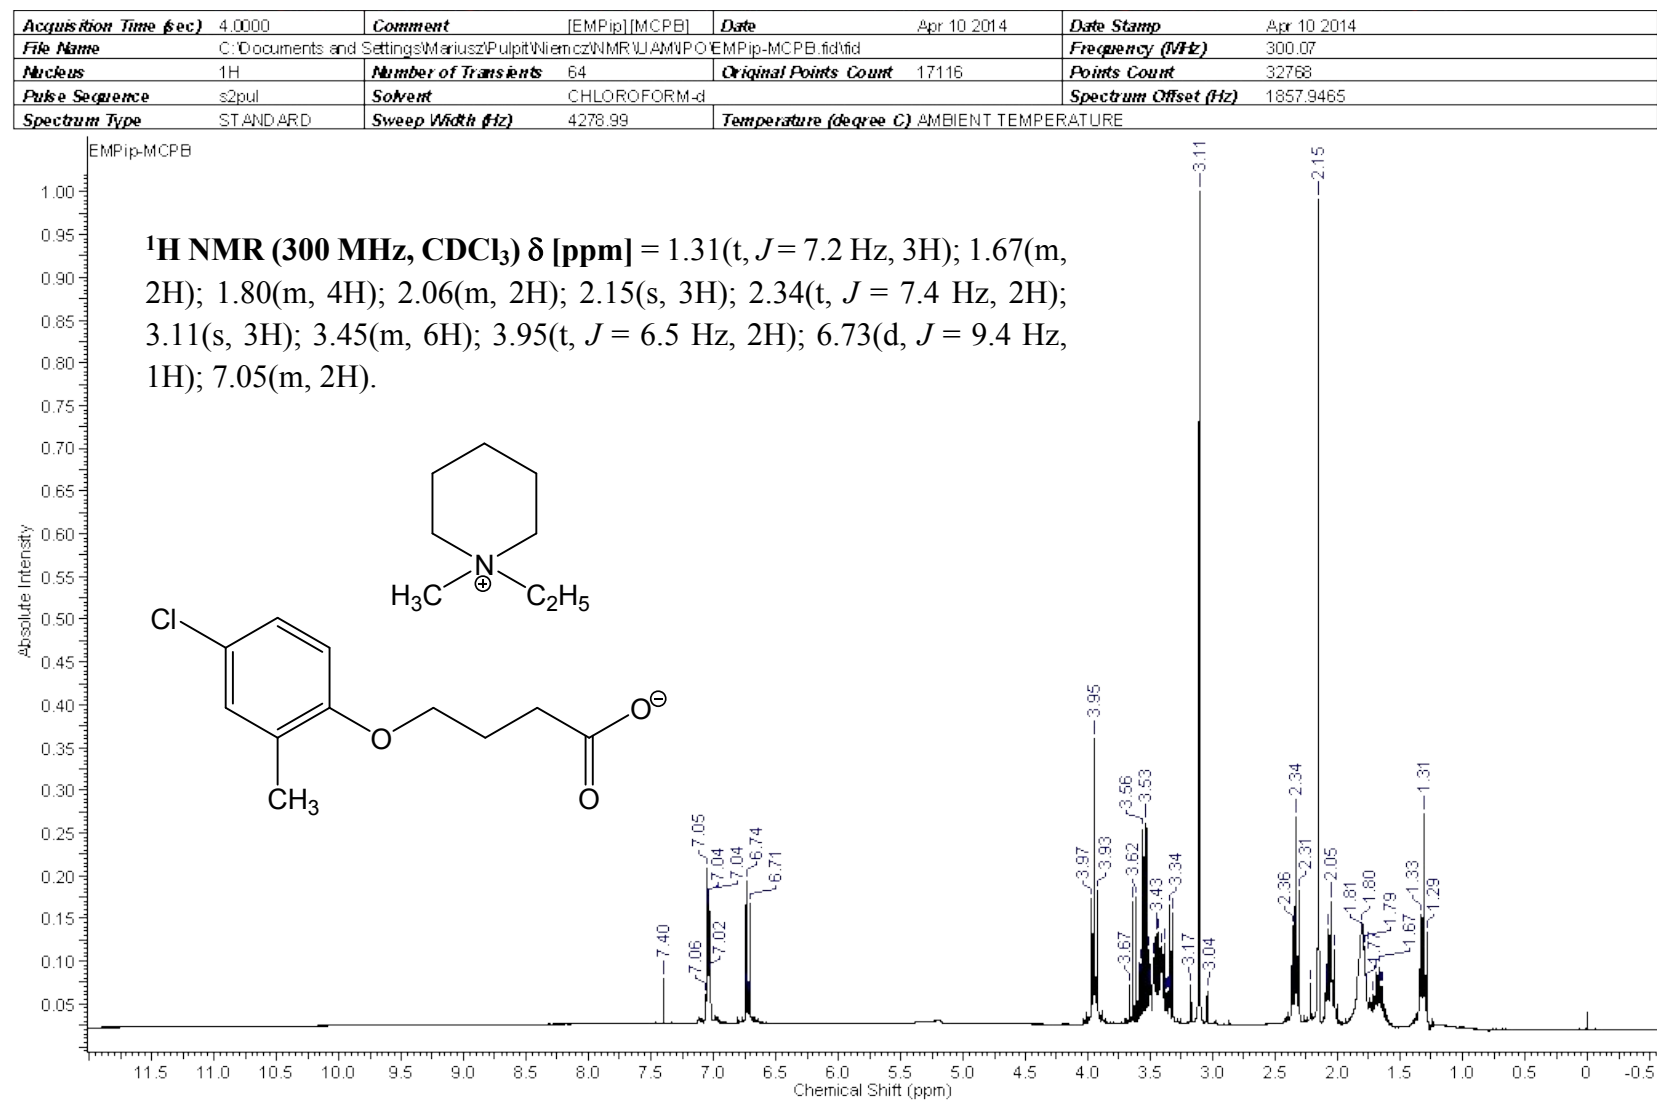

Figure S2.  $^{13}\text{C}$  NMR spectrum of 1-ethyl-1-methylpiperidinium 4-(4-chloro-2-methylphenoxy)butanoate (**1**).

|                        |                                                                                    |                      |               |                       |              |                        |                     |
|------------------------|------------------------------------------------------------------------------------|----------------------|---------------|-----------------------|--------------|------------------------|---------------------|
| Acquisition Time (sec) | 0.6401                                                                             | Comment              | [EMPip][MCPB] | Date                  | Apr 10 2014  | Date Stamp             | Apr 10 2014         |
| File Name              | C:\Documents and Settings\Mariusz Pulpit\Wieniec\NMR\JAMVPO\EMPip-MCPB-C13.fid\fid |                      |               | Frequency (MHz)       | 75.46        |                        |                     |
| Nucleus                | $^{13}\text{C}$                                                                    | Number of Transients | 700           | Original Points Count | 10830        | Points Count           | 16384               |
| Pulse Sequence         | s2pul                                                                              | Receiver Gain        | 30.00         | Solvent               | CHLOROFORM-d |                        |                     |
| Spectrum Offset (Hz)   | 7412.2061                                                                          | Spectrum Type        | STANDARD      | Sweep Width (Hz)      | 16920.47     | Temperature (degree C) | AMBIENT TEMPERATURE |

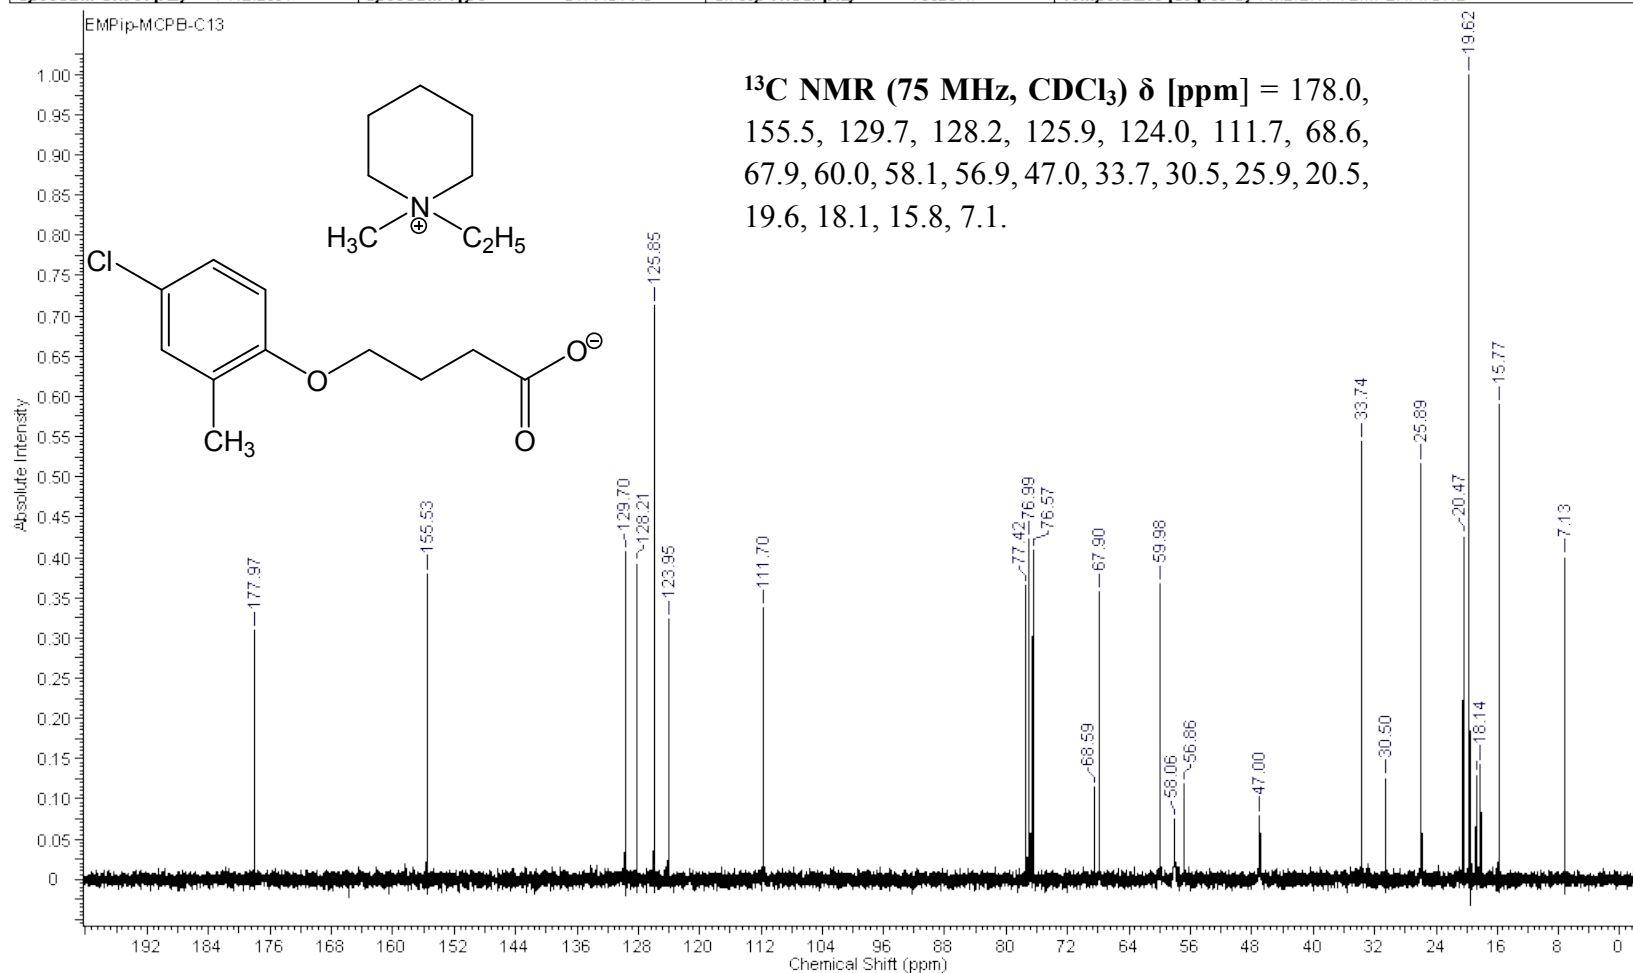

Figure S3. <sup>1</sup>H NMR spectrum of 1-methyl-1-propylpiperidinium 4-(4-chloro-2-methylphenoxy)butanoate (2).

|                        |                                                                                   |                      |              |                       |                 |                        |                     |
|------------------------|-----------------------------------------------------------------------------------|----------------------|--------------|-----------------------|-----------------|------------------------|---------------------|
| Acquisition Time (sec) | 7.0001                                                                            | Comment              | [PMPip][MPB] | Date                  | Apr 14 2014     | Date Stamp             | Apr 14 2014         |
| File Name              | C:\Documents and Settings\Mariusz\Pulpit\Niemcz\NMR\UJAM\PO\PMPIP-MCPB-H1.fid\fid |                      |              |                       | Frequency (MHz) | 402.64                 |                     |
| Nucleus                | 1H                                                                                | Number of Transients | 64           | Original Points Count | 40698           | Points Count           | 65536               |
| Pulse Sequence         | s2pul                                                                             | Receiver Gain        | 22.00        | Solvent               | CHLOROFORM-d    |                        |                     |
| Spectrum Offset (Hz)   | 2188.3943                                                                         | Spectrum Type        | STANDARD     | Sweep Width (Hz)      | 5813.95         | Temperature (degree C) | AMBIENT TEMPERATURE |

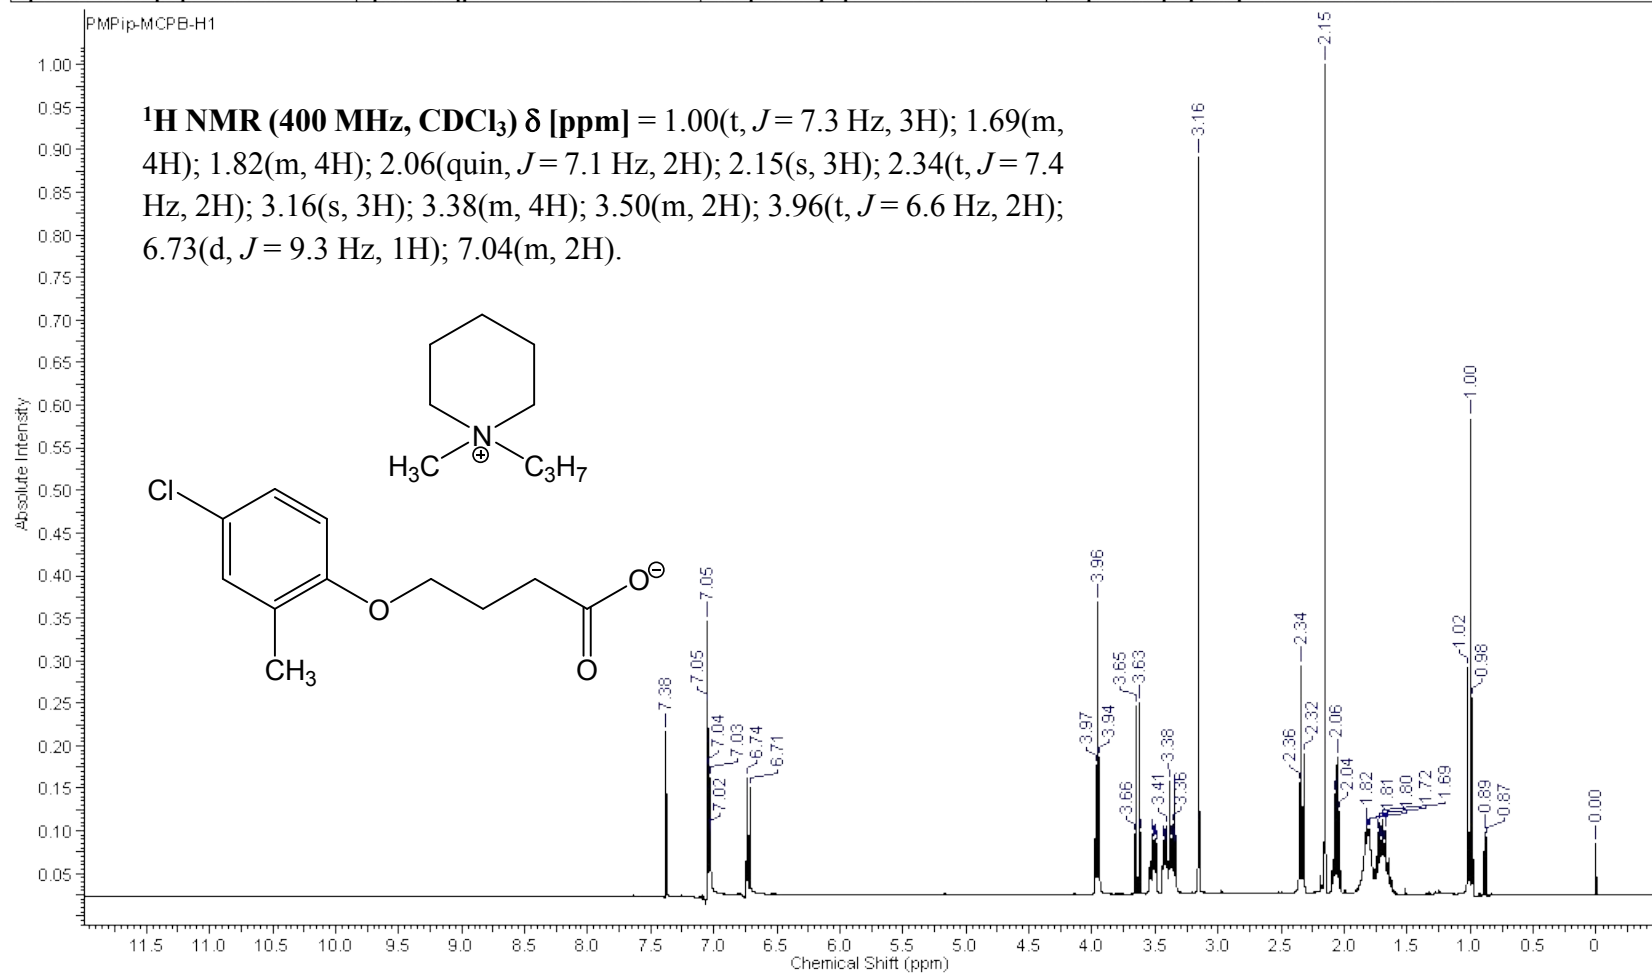

Figure S4.  $^{13}\text{C}$  NMR spectrum of 1-methyl-1-propylpiperidinium 4-(4-chloro-2-methylphenoxy)butanoate (**2**).

|                        |                                                                                   |                      |               |                       |                 |                        |                     |
|------------------------|-----------------------------------------------------------------------------------|----------------------|---------------|-----------------------|-----------------|------------------------|---------------------|
| Acquisition Time (sec) | 1.3006                                                                            | Comment              | [PMPip][MCPB] | Date                  | Apr 14 2014     | Date Stamp             | Apr 14 2014         |
| File Name              | C:\Documents and Settings\Mariusz\Pulpit\Niemcz\NMR\JAM\PO\PMPip-MCPB-C13.fid\fid |                      |               |                       | Frequency (MHz) | 101.26                 |                     |
| Nucleus                | $^{13}\text{C}$                                                                   | Number of Transients | 1024          | Original Points Count | 31878           | Points Count           | 32768               |
| Pulse Sequence         | s2pul                                                                             | Receiver Gain        | 36.00         | Solvent               | CHLOROFORM-d    |                        |                     |
| Spectrum Offset (Hz)   | 11115.3262                                                                        | Spectrum Type        | STANDARD      | Sweep Width (Hz)      | 24509.80        | Temperature (degree C) | AMBIENT TEMPERATURE |

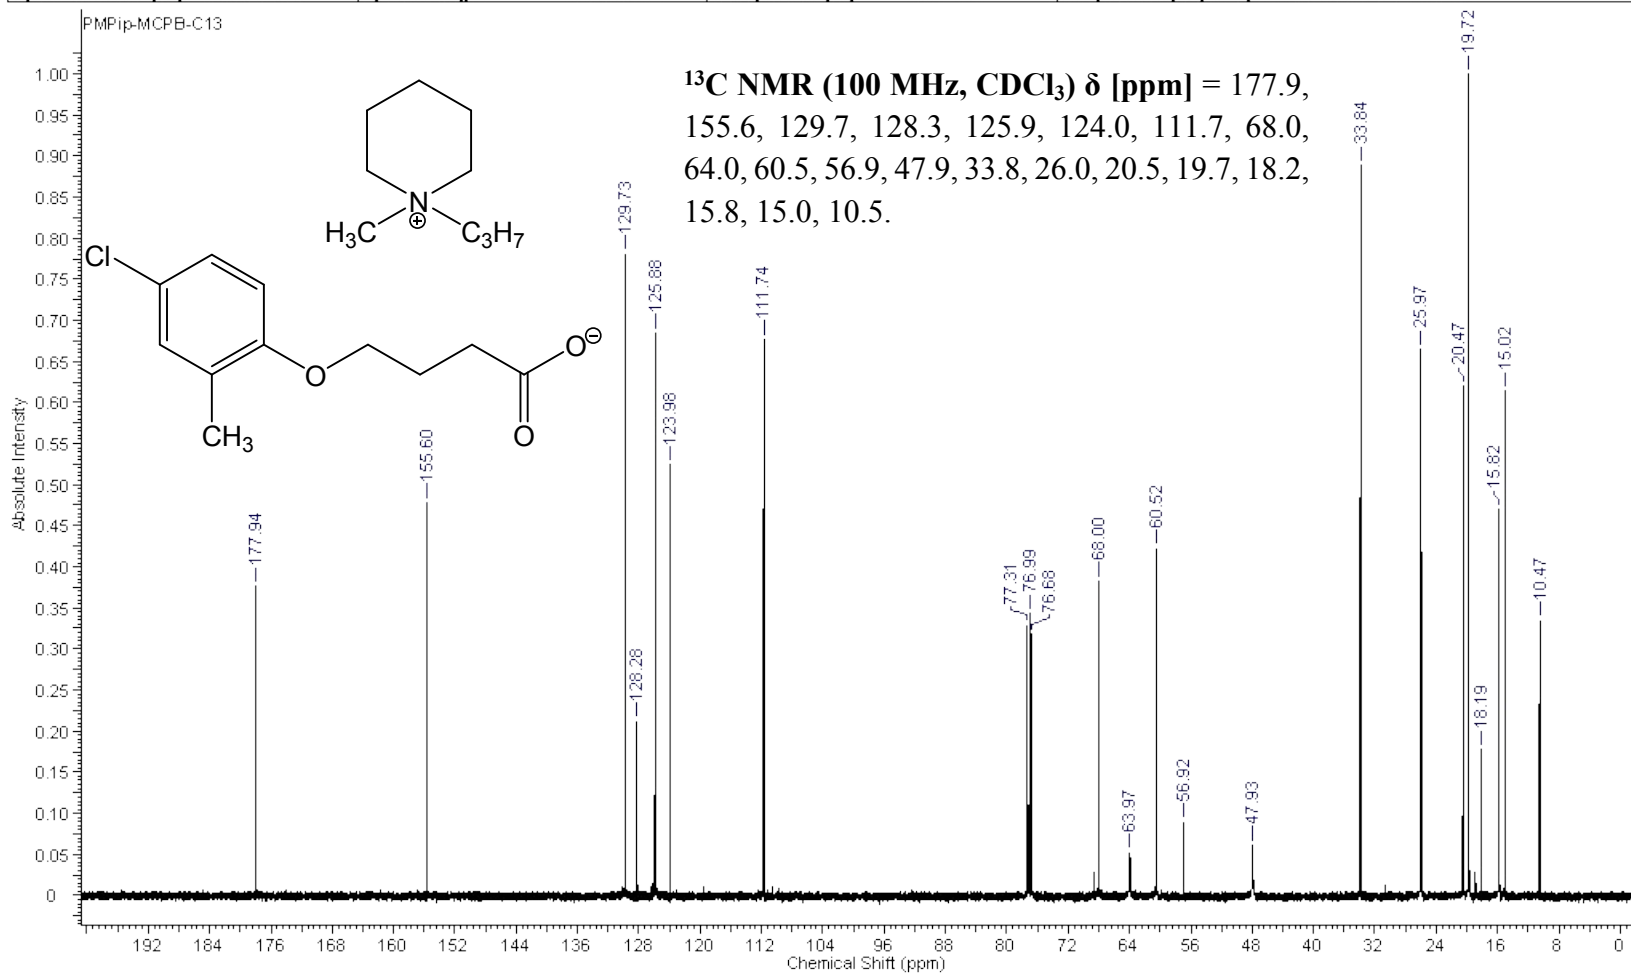

Figure S5. <sup>1</sup>H NMR spectrum of 1-butyl-1-methylpiperidinium 4-(4-chloro-2-methylphenoxy)butanoate (3).

|                        |                                                                                |                      |               |                       |                 |                        |                     |
|------------------------|--------------------------------------------------------------------------------|----------------------|---------------|-----------------------|-----------------|------------------------|---------------------|
| Acquisition Time (sec) | 7.0001                                                                         | Comment              | [BMPip][MCPB] | Date                  | Apr 14 2014     | Date Stamp             | Apr 14 2014         |
| File Name              | C:\Documents and Settings\Mariusz\Pulpit\Niemcz\NMR\UJAM\PO\BMPip-MCPB.fid\fid |                      |               |                       | Frequency (MHz) | 402.64                 |                     |
| Nucleus                | 1H                                                                             | Number of Transients | 32            | Original Points Count | 40698           | Points Count           | 65536               |
| Pulse Sequence         | s2pul                                                                          | Receiver Gain        | 22.00         | Solvent               | CHLOROFORM-d    |                        |                     |
| Spectrum Offset (Hz)   | 2192.7412                                                                      | Spectrum Type        | STANDARD      | Sweep Width (Hz)      | 5813.95         | Temperature (degree C) | AMBIENT TEMPERATURE |

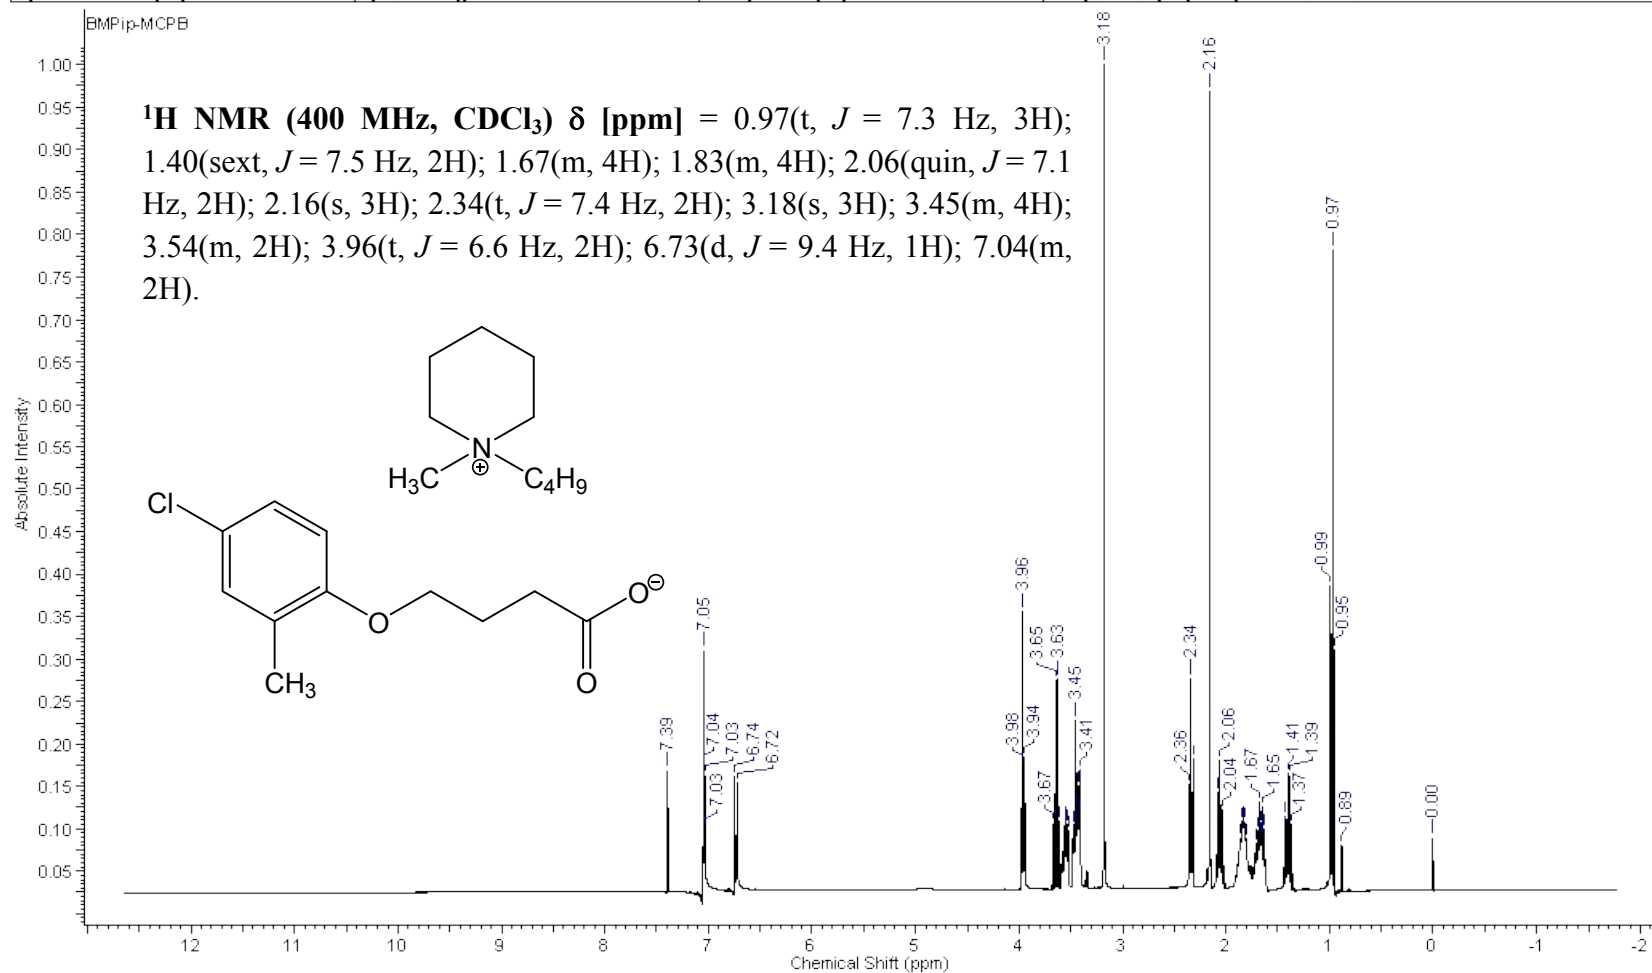



Figure S6.  $^{13}\text{C}$  NMR spectrum of 1-butyl-1-methylpiperidinium 4-(4-chloro-2-methylphenoxy)butanoate (**3**).

|                        |                                                                                   |                      |               |                       |              |                        |                     |
|------------------------|-----------------------------------------------------------------------------------|----------------------|---------------|-----------------------|--------------|------------------------|---------------------|
| Acquisition Time (sec) | 1.3006                                                                            | Comment              | [BMPip][MCPB] | Date                  | Apr 14 2014  | Date Stamp             | Apr 14 2014         |
| File Name              | C:\Documents and Settings\Mariusz Pulpit\Niemcz\NMR\JAM\PO\BMPip-MCPB-C13.fid\fid |                      |               | Frequency (MHz)       | 101.26       |                        |                     |
| Nucleus                | $^{13}\text{C}$                                                                   | Number of Transients | 904           | Original Points Count | 31878        | Points Count           | 32768               |
| Pulse Sequence         | s2pul                                                                             | Receiver Gain        | 36.00         | Solvent               | CHLOROFORM-d |                        |                     |
| Spectrum Offset (Hz)   | 11114.2031                                                                        | Spectrum Type        | STANDARD      | Sweep Width (Hz)      | 24509.80     | Temperature (degree C) | AMBIENT TEMPERATURE |

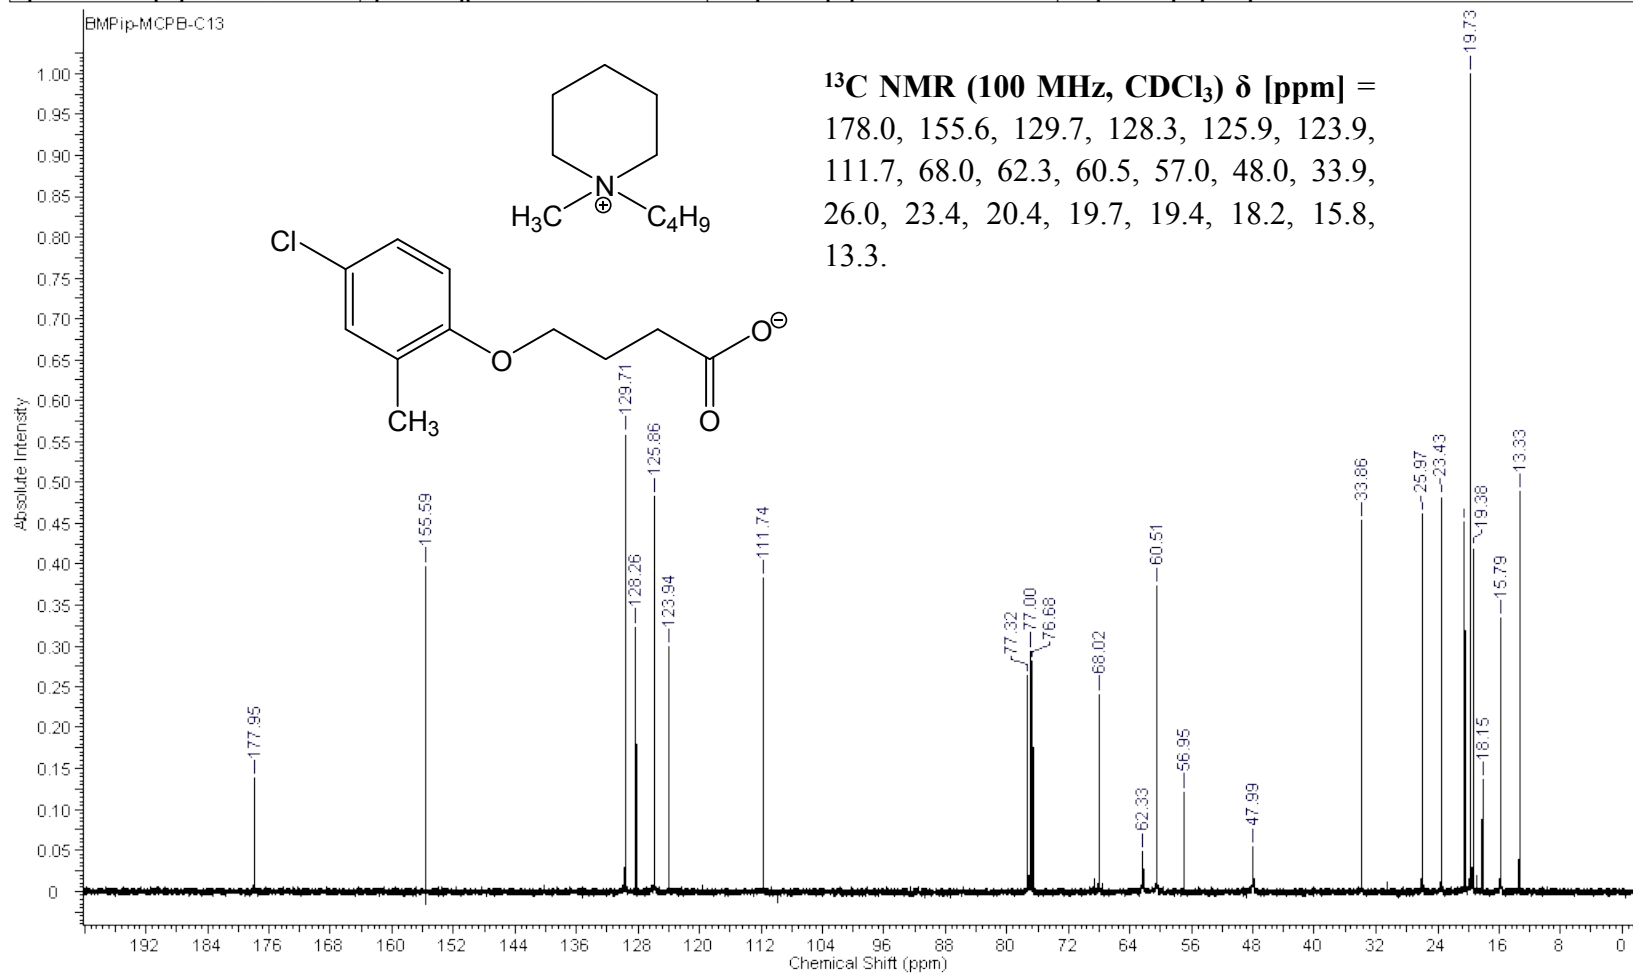

Figure S7. <sup>1</sup>H NMR spectrum of 1-methyl-1-pentylpiperidinium 4-(4-chloro-2-methylphenoxy)butanoate (4).

|                        |             |                |                                                                               |                        |                     |
|------------------------|-------------|----------------|-------------------------------------------------------------------------------|------------------------|---------------------|
| Acquisition Time (sec) | 5.5001      | Comment        | [C5-MPip][MCPB]                                                               | Date                   | Apr 24 2015         |
| Date Stamp             | Apr 24 2015 | File Name      | C:\Documents and Settings\Mariusz\Pulpit\Wiemcz\NMR\JAMPO\C5MPip-MCPB.fid\fid |                        |                     |
| Frequency (MHz)        | 402.64      | Nucleus        | <sup>1</sup> H                                                                | Number of Transients   | 64                  |
| Points Count           | 32768       | Pulse Sequence | s2pul                                                                         | Receiver Gain          | 18.00               |
| Spectrum Offset (Hz)   | 2149.5820   | Spectrum Type  | STANDARD                                                                      | Sweep Width (Hz)       | 4807.69             |
|                        |             |                |                                                                               | Solvent                | CHLOROFORM-d        |
|                        |             |                |                                                                               | Temperature (degree C) | AMBIENT TEMPERATURE |

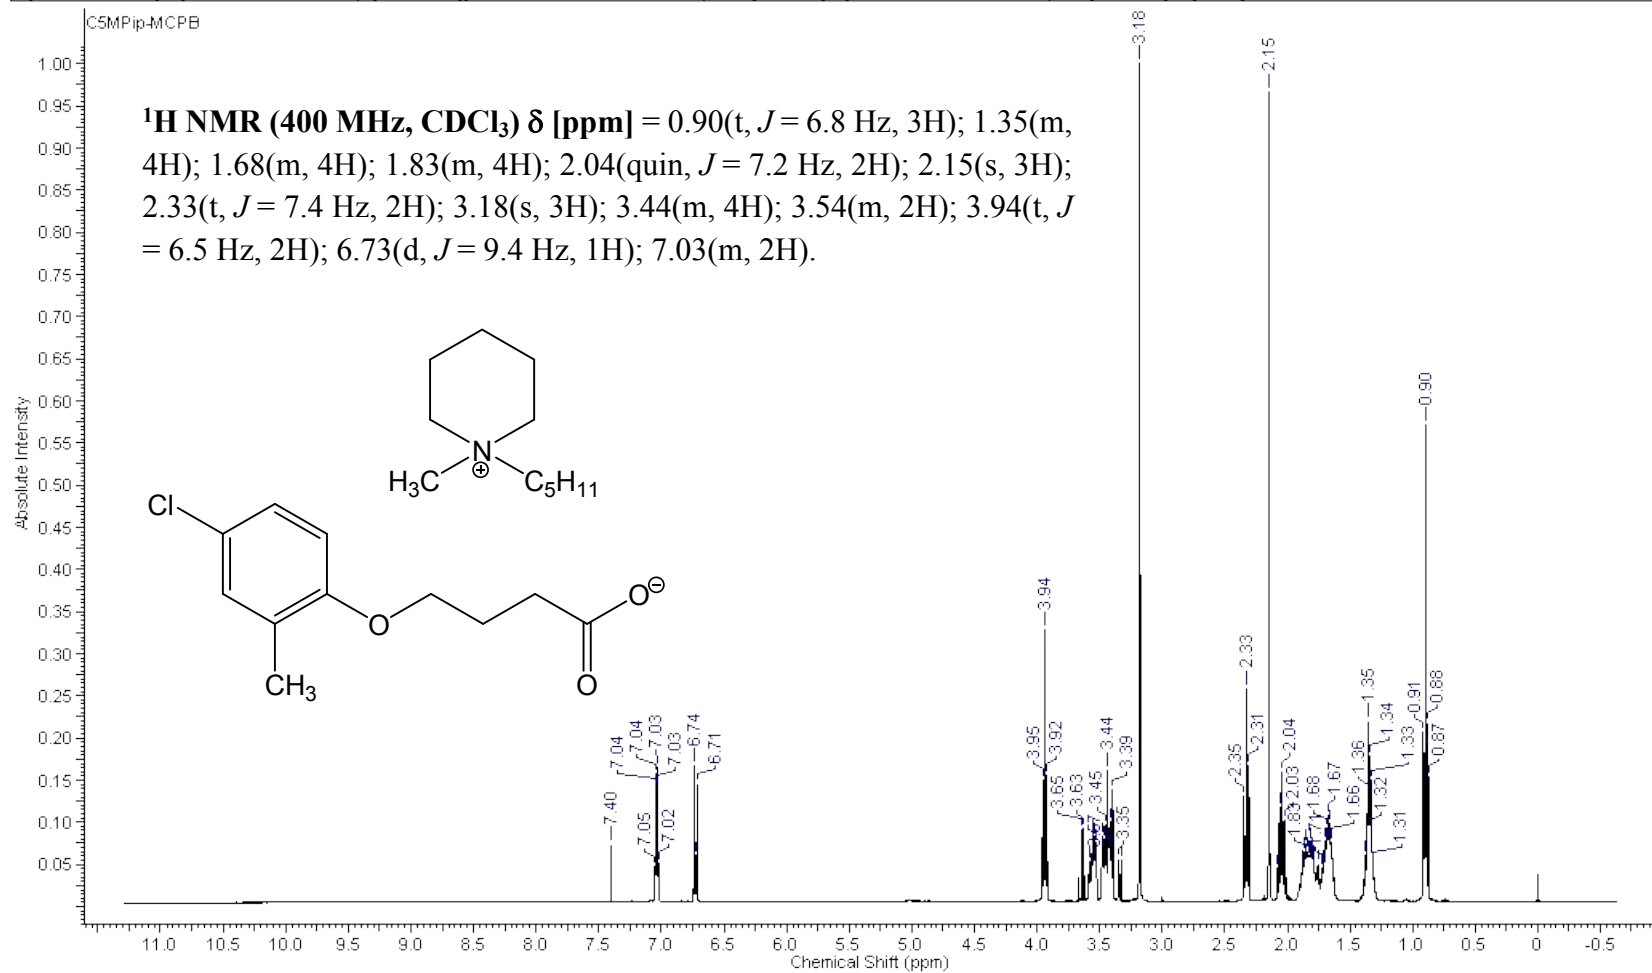

Figure S8.  $^{13}\text{C}$  NMR spectrum of 1-methyl-1-pentylpiperidinium 4-(4-chloro-2-methylphenoxy)butanoate (**4**).

|                        |             |                |                                                                                     |                        |                     |
|------------------------|-------------|----------------|-------------------------------------------------------------------------------------|------------------------|---------------------|
| Acquisition Time (sec) | 1.3010      | Comment        | [C5-MPip][MCPB]                                                                     | Date                   | Apr 24 2015         |
| Date Stamp             | Apr 24 2015 | File Name      | C:\Documents and Settings\Mariusz Pulpit\Niemcz\NMR\UAM\PO\IC5MPip-MCPB-c13.fid.tif |                        |                     |
| Frequency (MHz)        | 101.25      | Nucleus        | $^{13}\text{C}$                                                                     | Number of Transients   | 1024                |
| Points Count           | 32768       | Pulse Sequence | s2pul                                                                               | Receiver Gain          | 40.00               |
| Spectrum Offset (Hz)   | 9589.6855   | Spectrum Type  | STANDARD                                                                            | Sweep Width (Hz)       | 21551.72            |
|                        |             |                |                                                                                     | Original Points Count  | 28039               |
|                        |             |                |                                                                                     | Solvent                | CHLOROFORM-d        |
|                        |             |                |                                                                                     | Temperature (degree C) | AMBIENT TEMPERATURE |

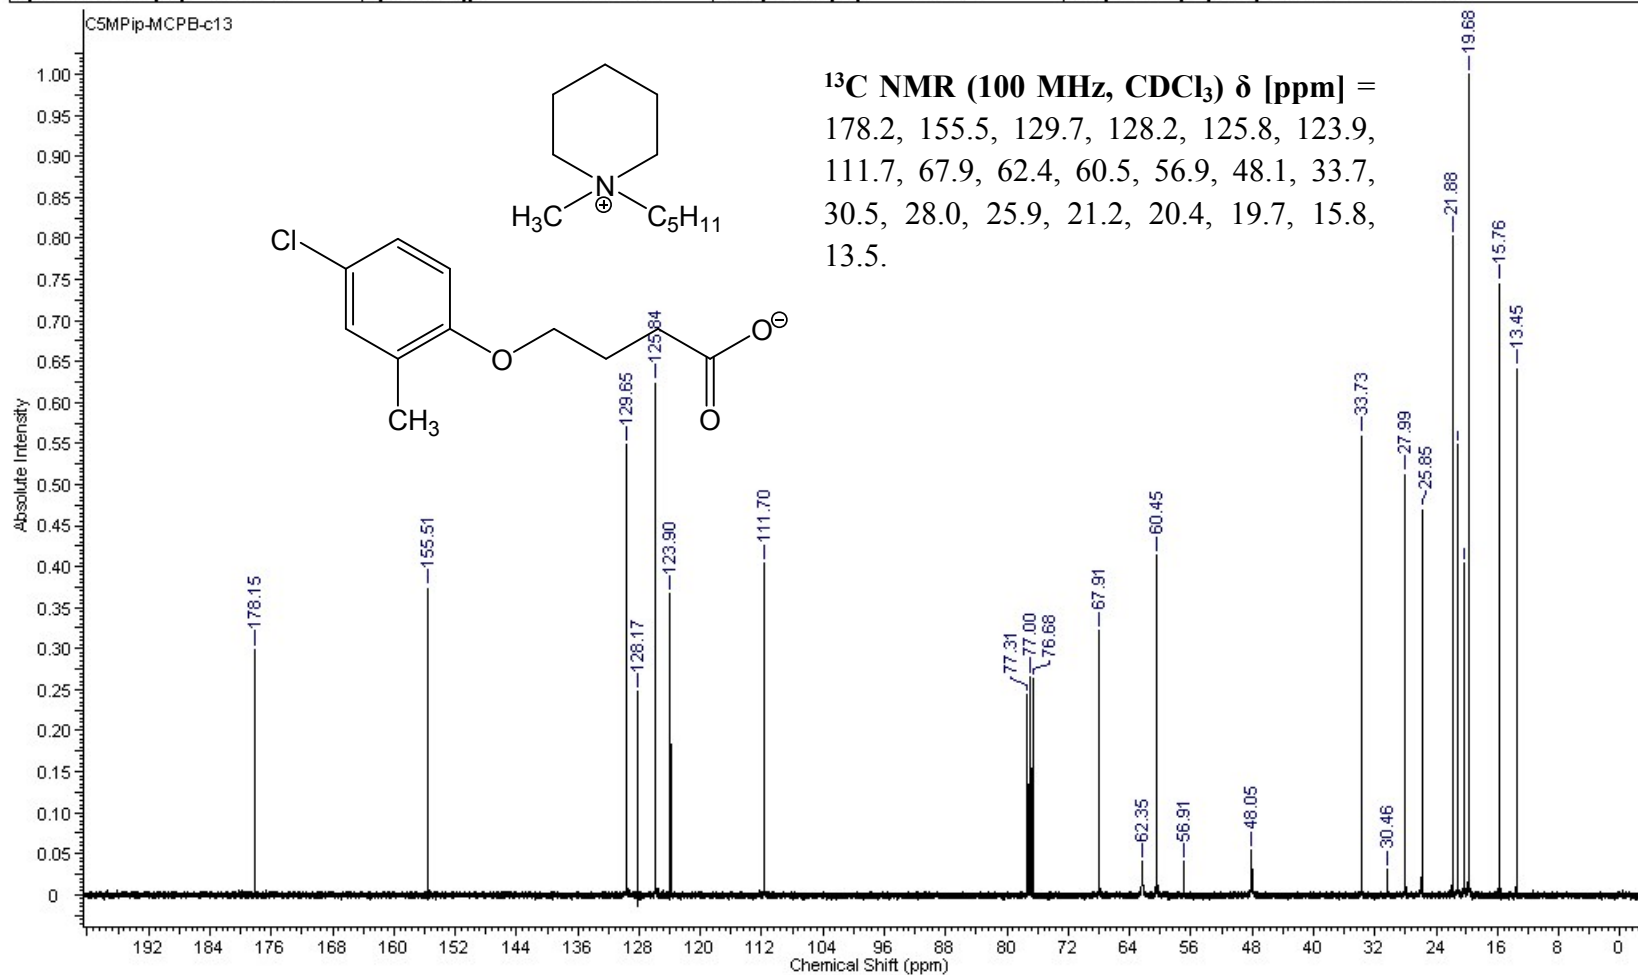

Figure S9. <sup>1</sup>H NMR spectrum of 1-hexyl-1-methylpiperidinium 4-(4-chloro-2-methylphenoxy)butanoate (**5**).

|                        |             |                |                                                                                |                        |                     |
|------------------------|-------------|----------------|--------------------------------------------------------------------------------|------------------------|---------------------|
| Acquisition Time (sec) | 6.9999      | Comment        | [C6-MPip].[MCPB]                                                               | Date                   | Apr 24 2015         |
| Date Stamp             | Apr 24 2015 | File Name      | C:\Documents and Settings\Mariusz Pulpit\Niemcz\NMR\JAM\PO\C6MPip-MCPB.fid\fid |                        |                     |
| Frequency (MHz)        | 402.64      | Nucleus        | 1H                                                                             | Number of Transients   | 64                  |
| Points Count           | 65536       | Pulse Sequence | s2pul                                                                          | Receiver Gain          | 18.00               |
| Spectrum Offset (Hz)   | 2301.2163   | Spectrum Type  | STANDARD                                                                       | Sweep Width (Hz)       | 5208.33             |
|                        |             |                |                                                                                | Original Points Count  | 36458               |
|                        |             |                |                                                                                | Solvent                | CHLOROFORM-d        |
|                        |             |                |                                                                                | Temperature (degree C) | AMBIENT TEMPERATURE |

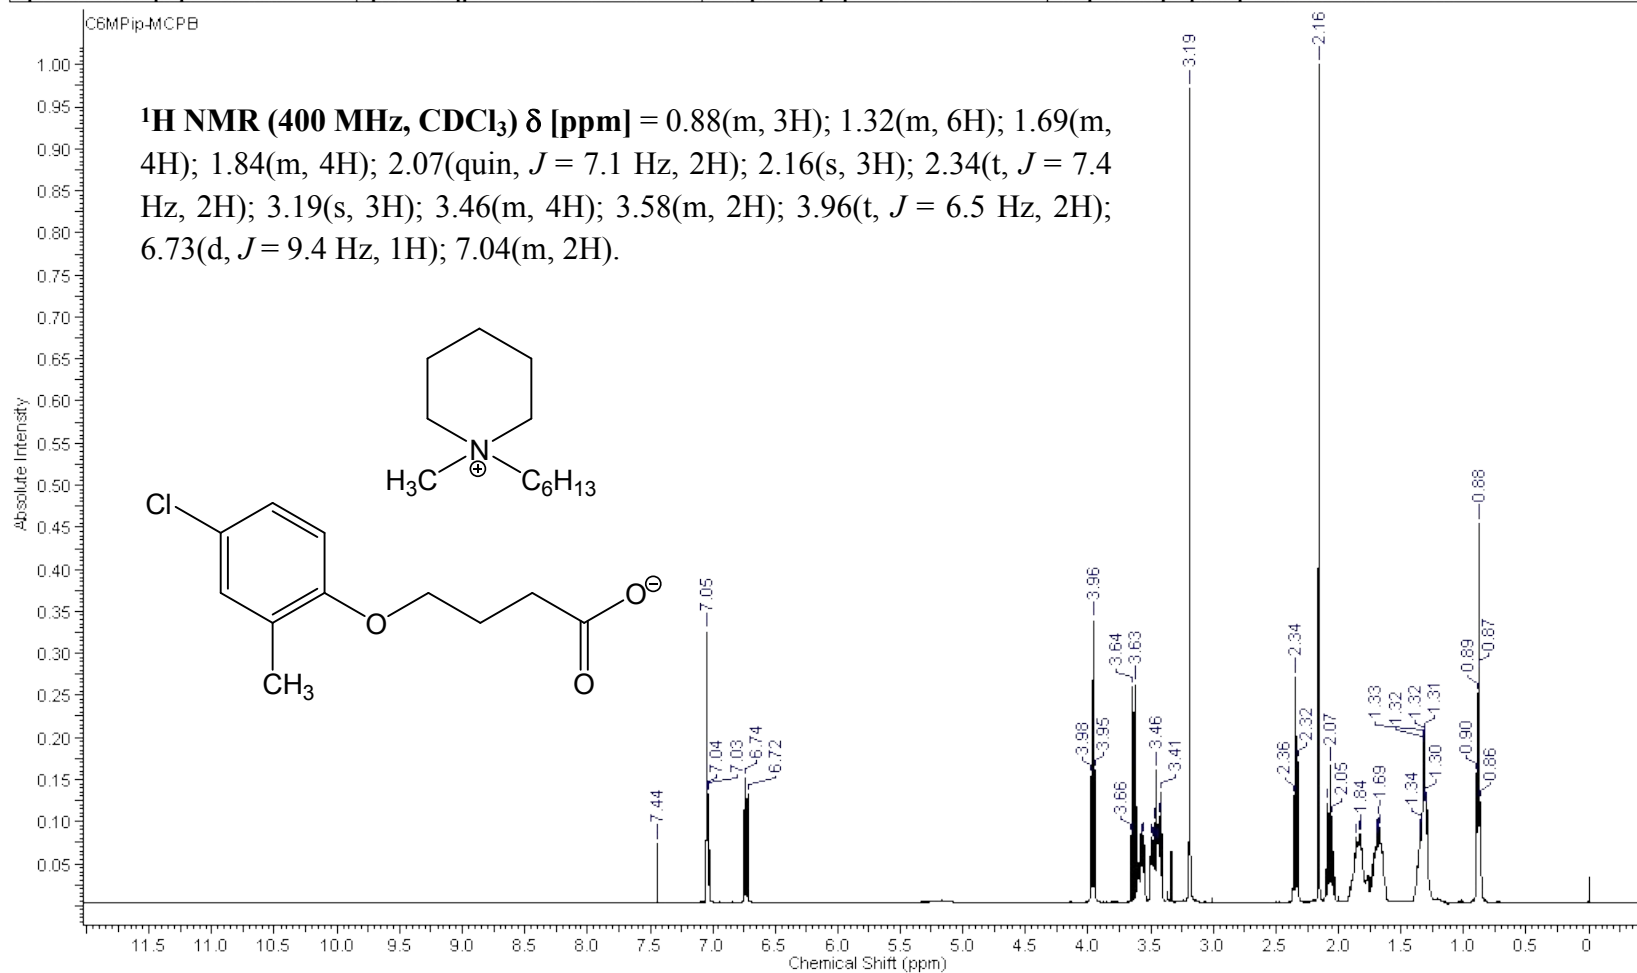

Figure S10. <sup>13</sup>C NMR spectrum of 1-hexyl-1-methylpiperidinium 4-(4-chloro-2-methylphenoxy)butanoate (5).

|                        |                                                                                    |                      |                |                       |                 |                        |                     |
|------------------------|------------------------------------------------------------------------------------|----------------------|----------------|-----------------------|-----------------|------------------------|---------------------|
| Acquisition Time (sec) | 1.3010                                                                             | Comment              | [C6MPip][MCPB] | Date                  | Apr 24 2015     | Date Stamp             | Apr 24 2015         |
| File Name              | C:\Documents and Settings\Mariusz\Pulpit\Niemcz\NMR\UAM\PO\C6MPip-MCPB-C13.fid\fid |                      |                |                       | Frequency (MHz) | 101.25                 |                     |
| Nucleus                | <sup>13</sup> C                                                                    | Number of Transients | 800            | Original Points Count | 28039           | Points Count           | 32768               |
| Pulse Sequence         | s2pul                                                                              | Receiver Gain        | 40.00          | Solvent               | CHLOROFORM-d    |                        |                     |
| Spectrum Offset (Hz)   | 9584.4238                                                                          | Spectrum Type        | STANDARD       | Sweep Width (Hz)      | 21551.72        | Temperature (degree C) | AMBIENT TEMPERATURE |

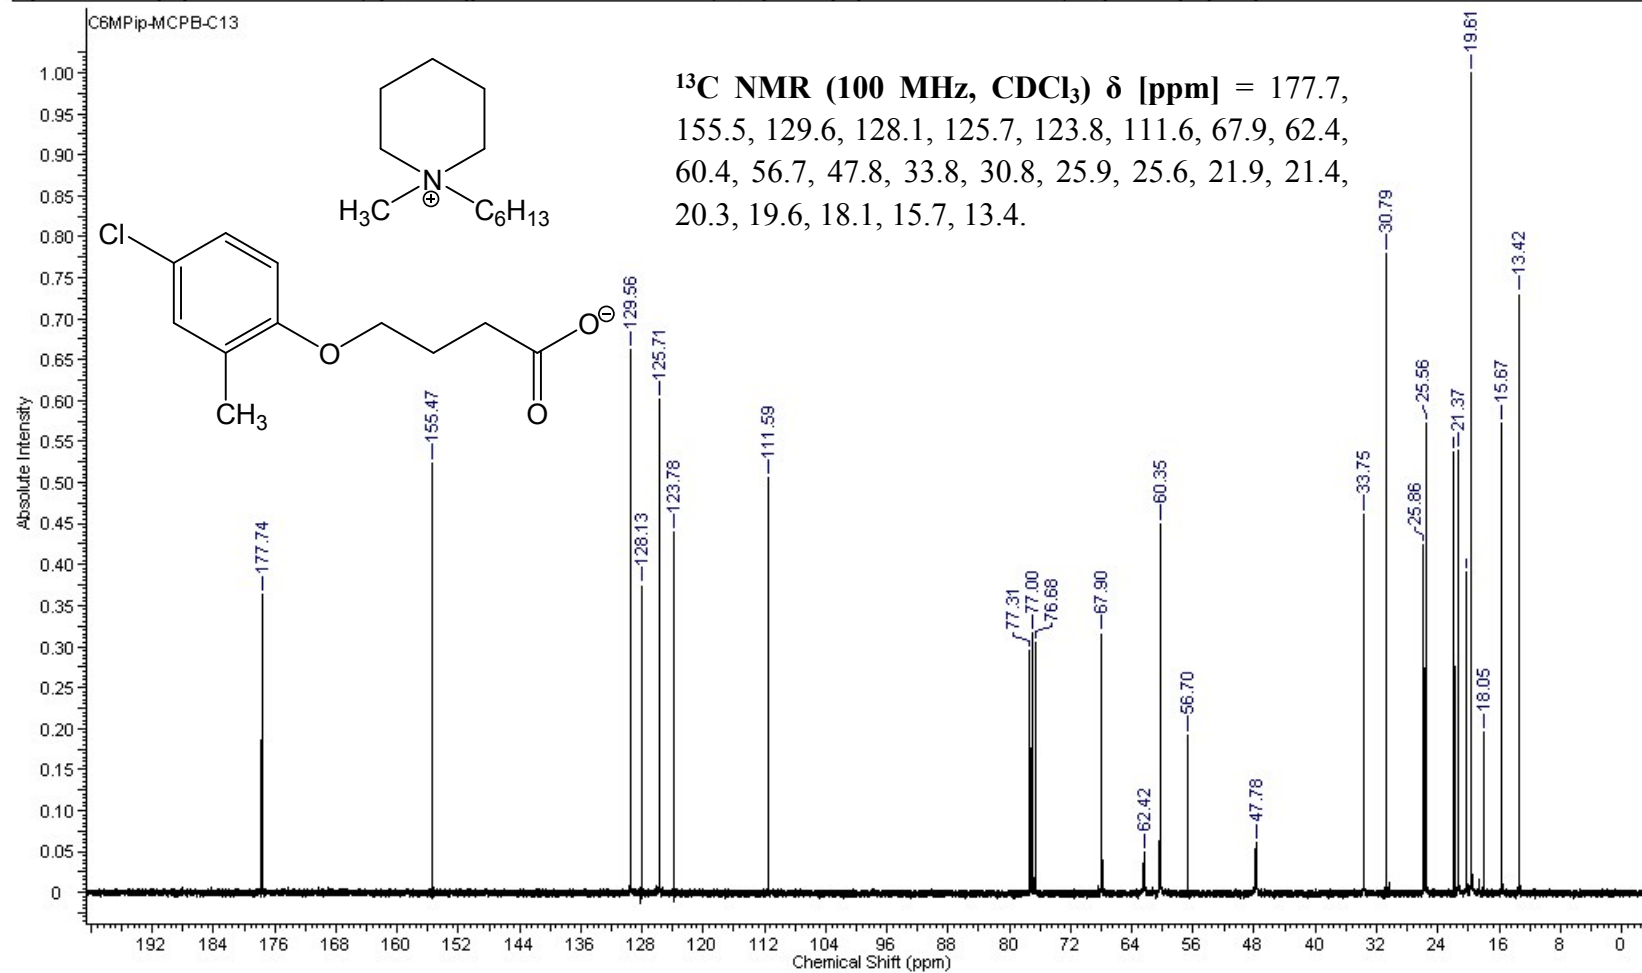

Figure S11. <sup>1</sup>H NMR spectrum of 1-heptyl-1-methylpiperidinium 4-(4-chloro-2-methylphenoxy)butanoate (**6**).

|                        |             |                |                                                                                |                      |              |                        |                     |
|------------------------|-------------|----------------|--------------------------------------------------------------------------------|----------------------|--------------|------------------------|---------------------|
| Acquisition Time (sec) | 4.0001      | Comment        | [C7-MPip] [MCPB]                                                               |                      | Date         | Apr 23 2015            |                     |
| Date Stamp             | Apr 23 2015 | File Name      | C:\Documents and Settings\Mariusz Pulpit\Niemcz\NMR\UAM\PO\C7MPip-MCPB.fid\fid |                      |              |                        |                     |
| Frequency (MHz)        | 300.07      | Nucleus        | 1H                                                                             | Number of Transients | 64           | Original Points Count  | 12941               |
| Points Count           | 16384       | Pulse Sequence | s2pul                                                                          | Solvent              | CHLOROFORM-d |                        |                     |
| Spectrum Offset (Hz)   | 1408.3865   | Spectrum Type  | STANDARD                                                                       | Sweep Width (Hz)     | 3235.20      | Temperature (degree C) | AMBIENT TEMPERATURE |

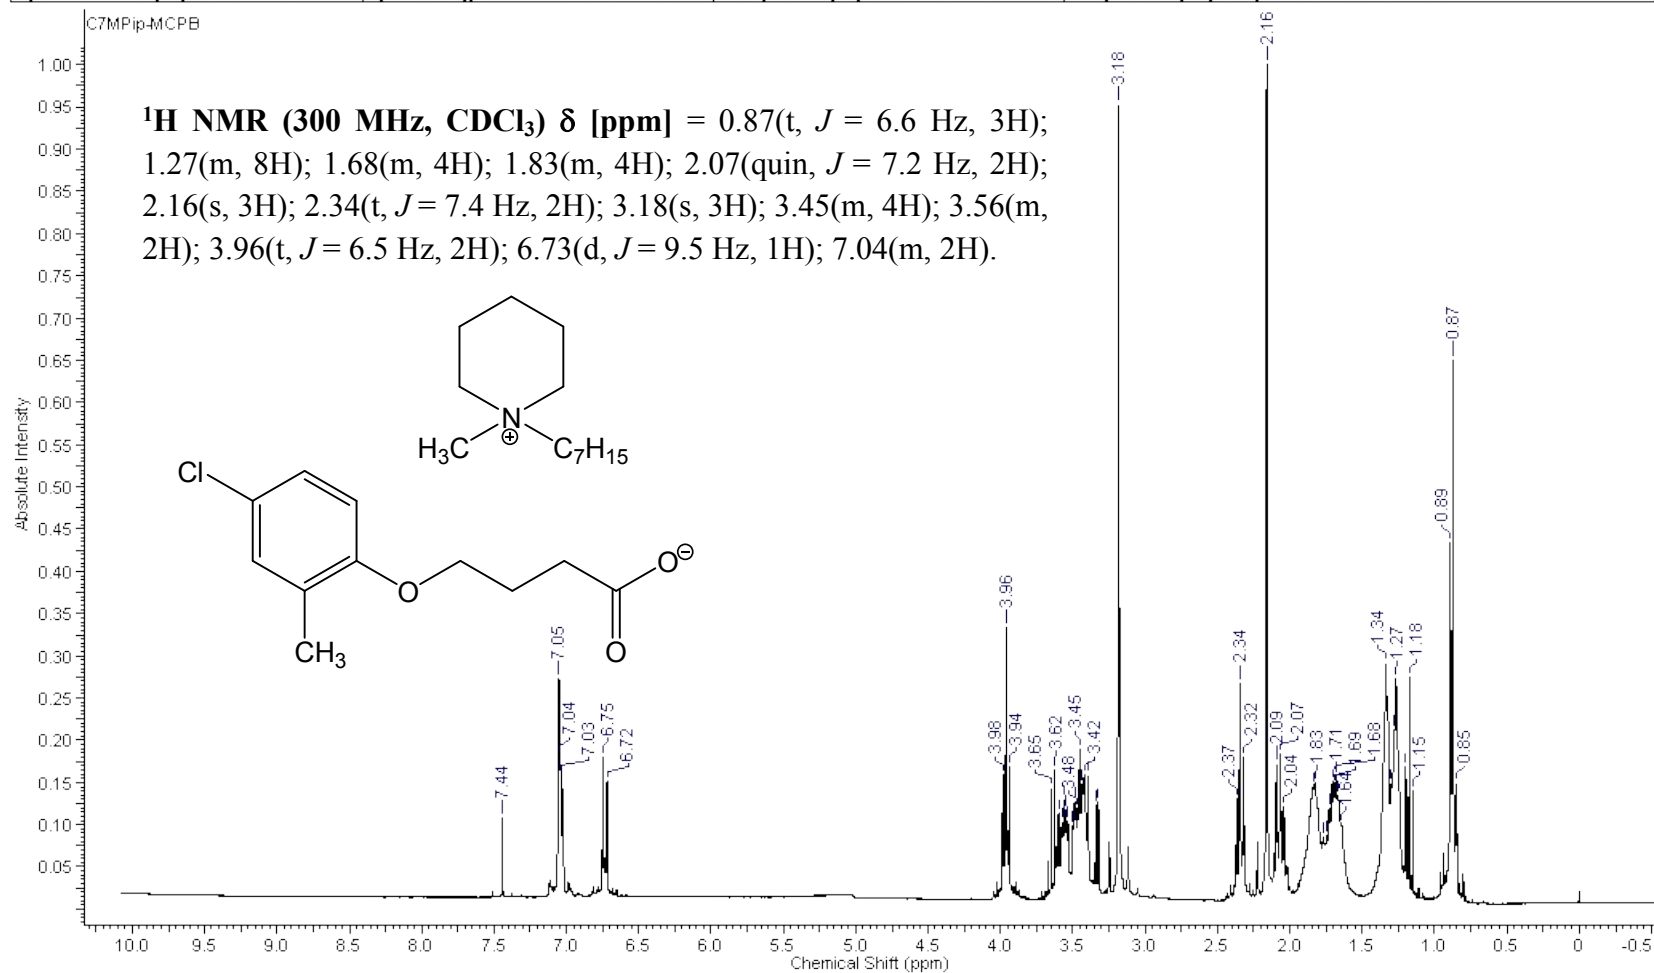

Figure S12.  $^{13}\text{C}$  NMR spectrum of 1-heptyl-1-methylpiperidinium 4-(4-chloro-2-methylphenoxy)butanoate (**6**).

|                        |             |                |                                                                                    |                        |                     |
|------------------------|-------------|----------------|------------------------------------------------------------------------------------|------------------------|---------------------|
| Acquisition Time (sec) | 0.6400      | Comment        | [C7-MPip] [MCPB]                                                                   | Date                   | Apr 23 2015         |
| Date Stamp             | Apr 23 2015 | File Name      | C:\Documents and Settings\Mariusz\Pulpit\Niemcz\NMR\UJAM\POC7MPip-MCPB-c13.fid\fid |                        |                     |
| Frequency (MHz)        | 75.46       | Nucleus        | $^{13}\text{C}$                                                                    | Number of Transients   | 1452                |
| Points Count           | 16384       | Pulse Sequence | s2pul                                                                              | Receiver Gain          | 34.00               |
| Spectrum Offset (Hz)   | 7082.9160   | Spectrum Type  | STANDARD                                                                           | Sweep Width (Hz)       | 16025.64            |
|                        |             |                |                                                                                    | Original Points Count  | 10257               |
|                        |             |                |                                                                                    | Solvent                | CHLOROFORM-d        |
|                        |             |                |                                                                                    | Temperature (degree C) | AMBIENT TEMPERATURE |

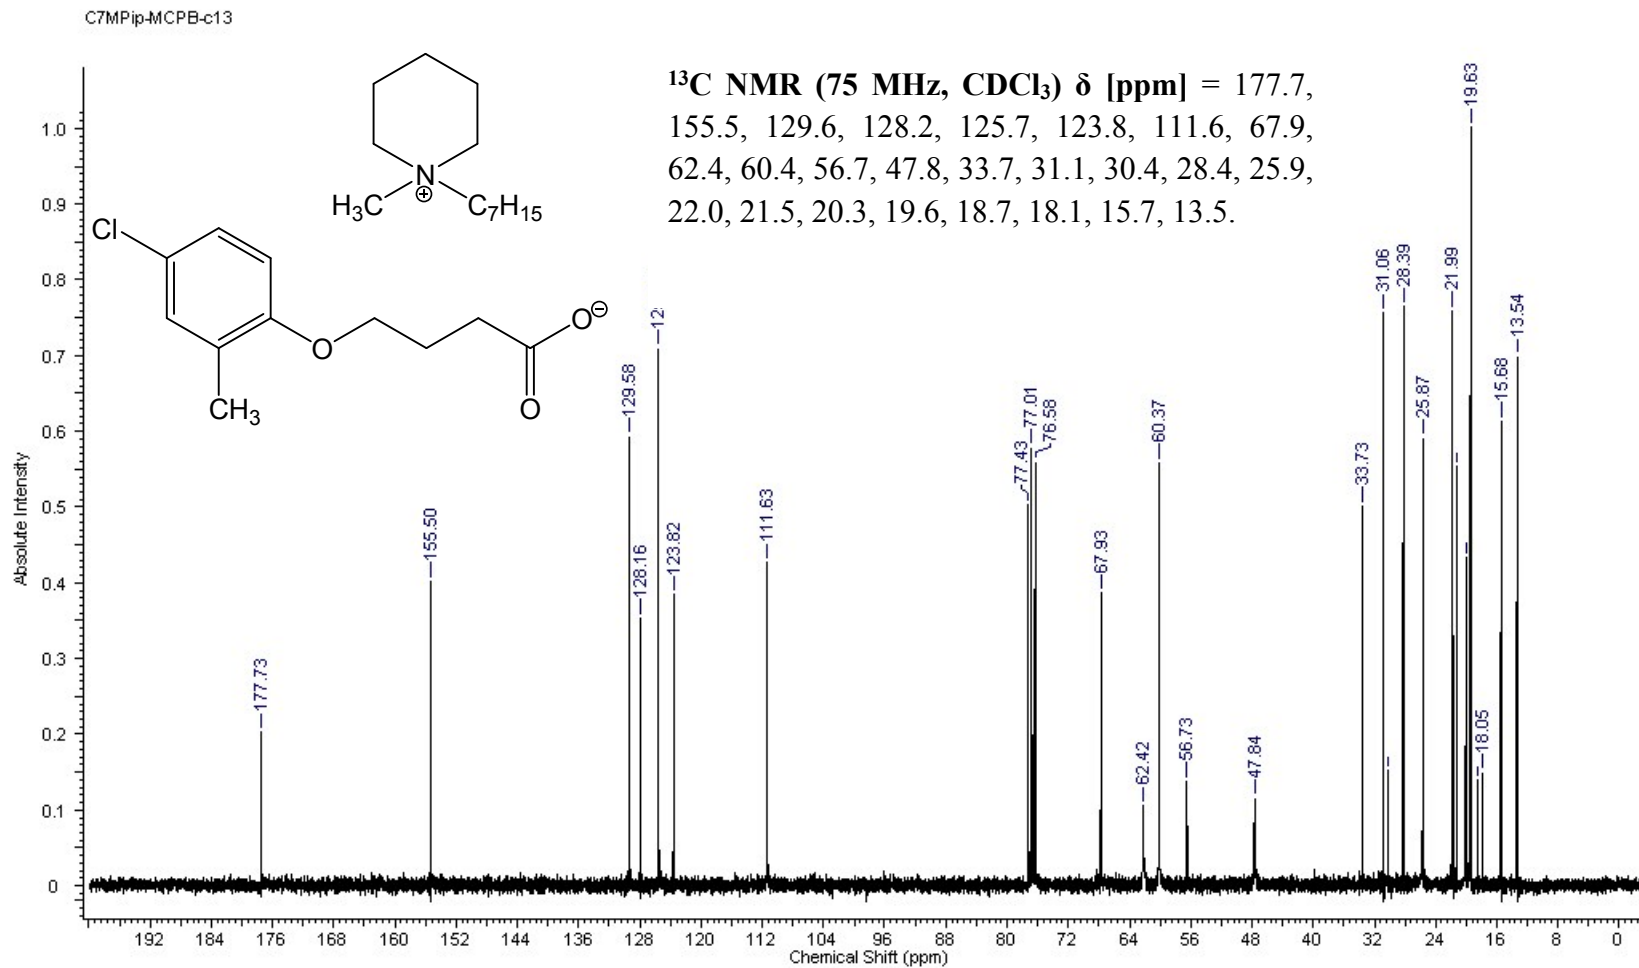

**Figure S13.**  $^1\text{H}$  NMR spectrum of 1-methyl-1-octylpiperidinium 4-(4-chloro-2-methylphenoxy)butanoate (**7**).

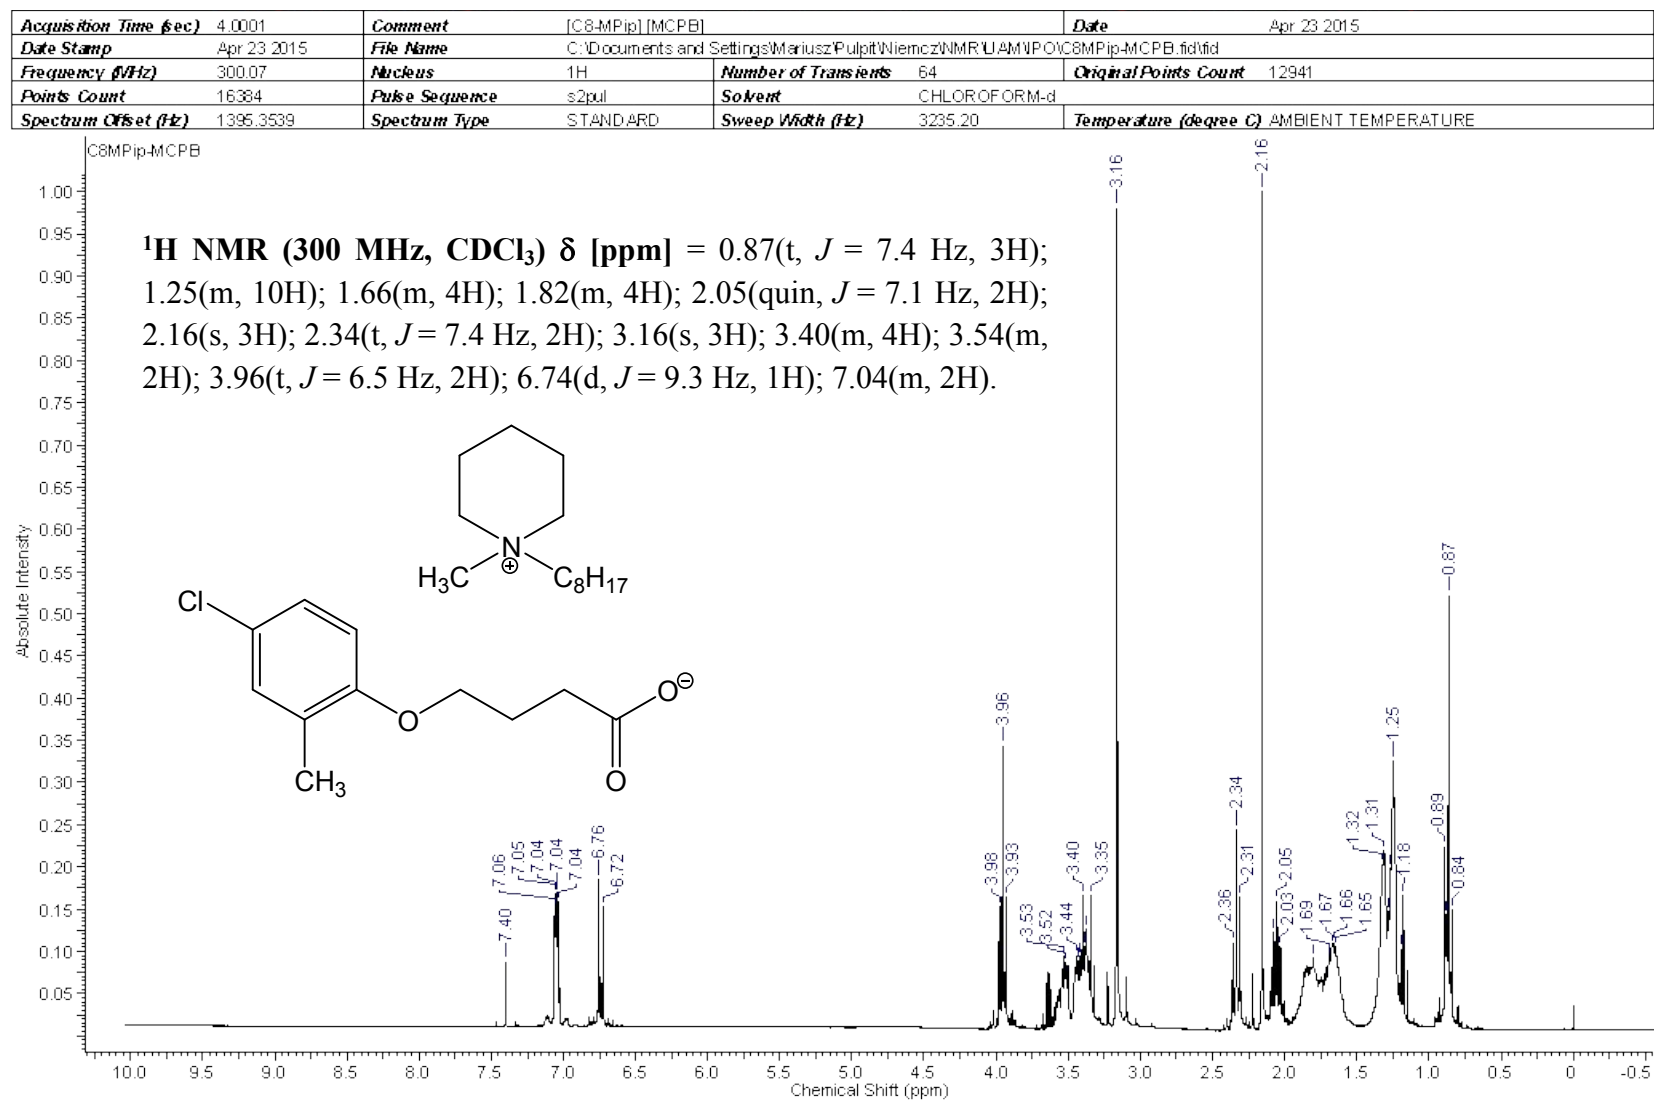



Figure S14.  $^{13}\text{C}$  NMR spectrum of 1-methyl-1-octylpiperidinium 4-(4-chloro-2-methylphenoxy)butanoate (7).

|                        |             |                |                                                                                    |                        |                     |
|------------------------|-------------|----------------|------------------------------------------------------------------------------------|------------------------|---------------------|
| Acquisition Time (sec) | 0.6400      | Comment        | [C8-MPip].[MCPB]                                                                   | Date                   | Apr 23 2015         |
| Date Stamp             | Apr 23 2015 | File Name      | C:\Documents and Settings\Mariusz\Pulpit\Niemcz\NMR\JAMNPO\C8MPip-MCPB-c13.fid\fid |                        |                     |
| Frequency (MHz)        | 75.46       | Nucleus        | $^{13}\text{C}$                                                                    | Number of Transients   | 1148                |
| Points Count           | 16384       | Pulse Sequence | s2pul                                                                              | Receiver Gain          | 34.00               |
| Spectrum Offset (Hz)   | 7087.8071   | Spectrum Type  | STANDARD                                                                           | Sweep Width (Hz)       | 16025.64            |
|                        |             |                |                                                                                    | Original Points Count  | 10257               |
|                        |             |                |                                                                                    | Solvent                | CHLOROFORM-d        |
|                        |             |                |                                                                                    | Temperature (degree C) | AMBIENT TEMPERATURE |

C8MPip-MCPB-c13

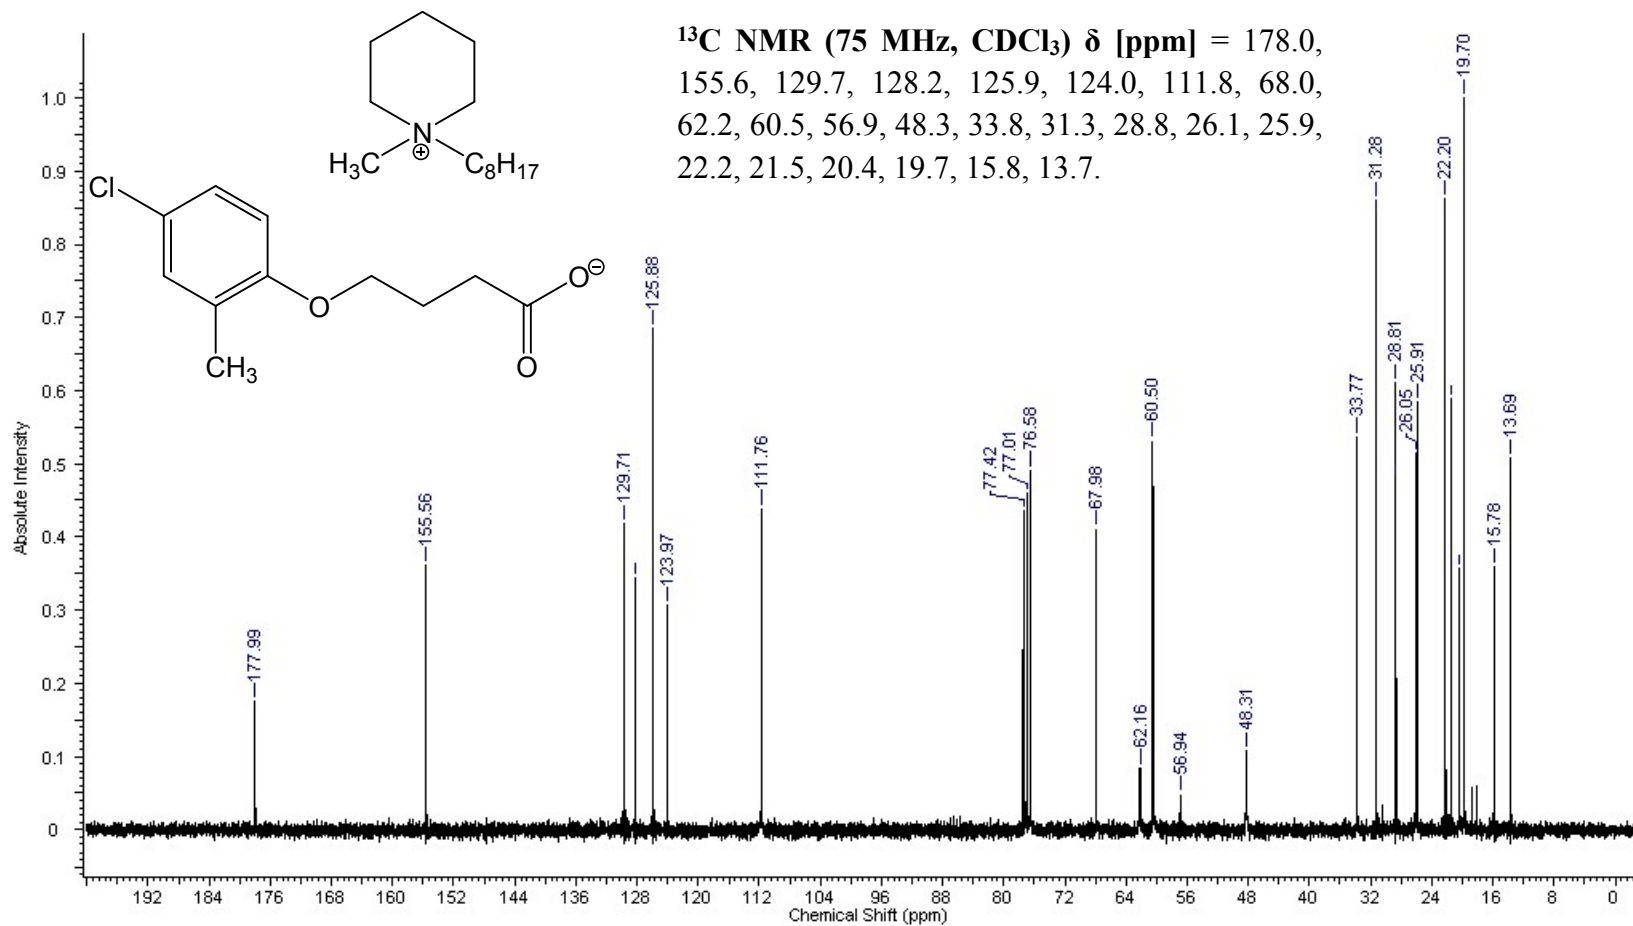

**Figure S15.**  $^1\text{H}$  NMR spectrum of 1-methyl-1-nonylpiperidinium 4-(4-chloro-2-methylphenoxy)butanoate (**8**).

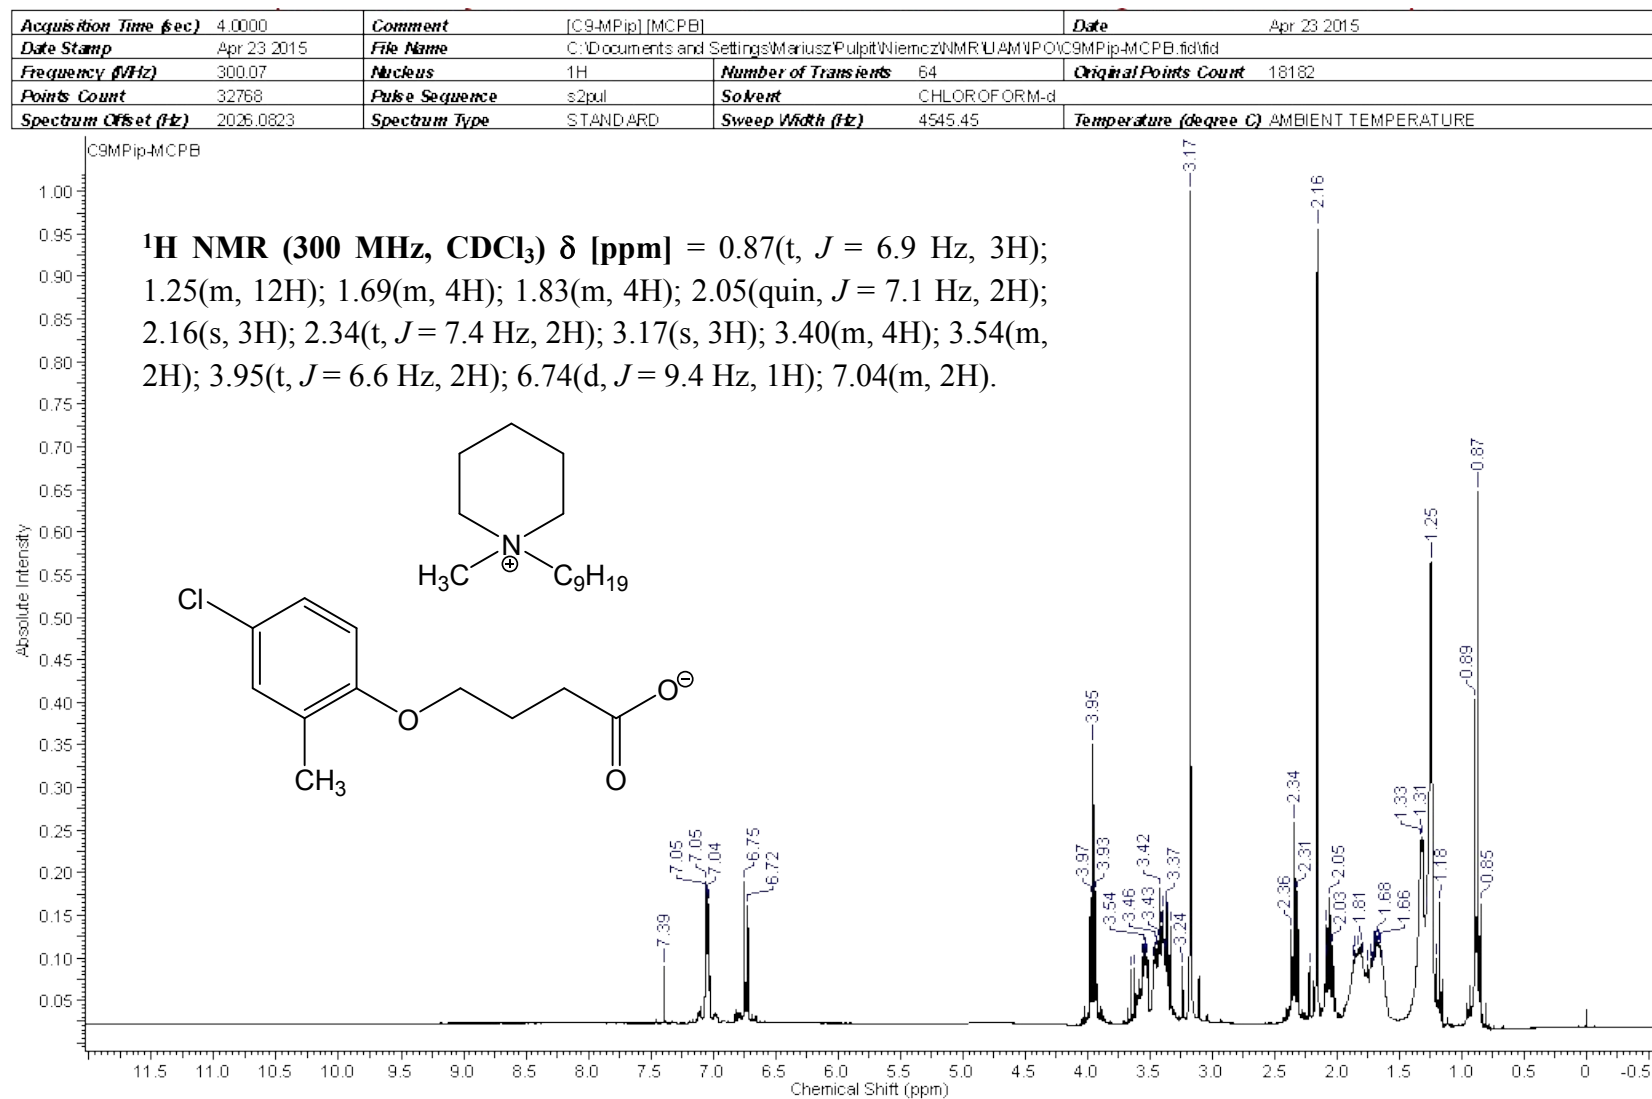

Figure S16.  $^{13}\text{C}$  NMR spectrum of 1-methyl-1-nonylpiperidinium 4-(4-chloro-2-methylphenoxy)butanoate (**8**).

|                        |             |                |                                                                                      |                      |          |                        |                     |
|------------------------|-------------|----------------|--------------------------------------------------------------------------------------|----------------------|----------|------------------------|---------------------|
| Acquisition Time (sec) | 0.6400      | Comment        | [C9-MPip] [MCPB]                                                                     |                      | Date     | Apr 23 2015            |                     |
| Date Stamp             | Apr 23 2015 | File Name      | C:\Documents and Settings\Mariusz Pulpit\Niemcz\NMR\UAM\PO\IC9-MPip-MCPB-C13.fid\fid |                      |          |                        |                     |
| Frequency (MHz)        | 75.46       | Nucleus        | $^{13}\text{C}$                                                                      | Number of Transients | 2000     | Original Points Count  | 10257               |
| Points Count           | 16384       | Pulse Sequence | s2pul                                                                                | Receiver Gain        | 34.00    | Solvent                | CHLOROFORM-d        |
| Spectrum Offset (Hz)   | 7088.7847   | Spectrum Type  | STANDARD                                                                             | Sweep Width (Hz)     | 16025.64 | Temperature (degree C) | AMBIENT TEMPERATURE |

C9-MPip-MCPB-C13

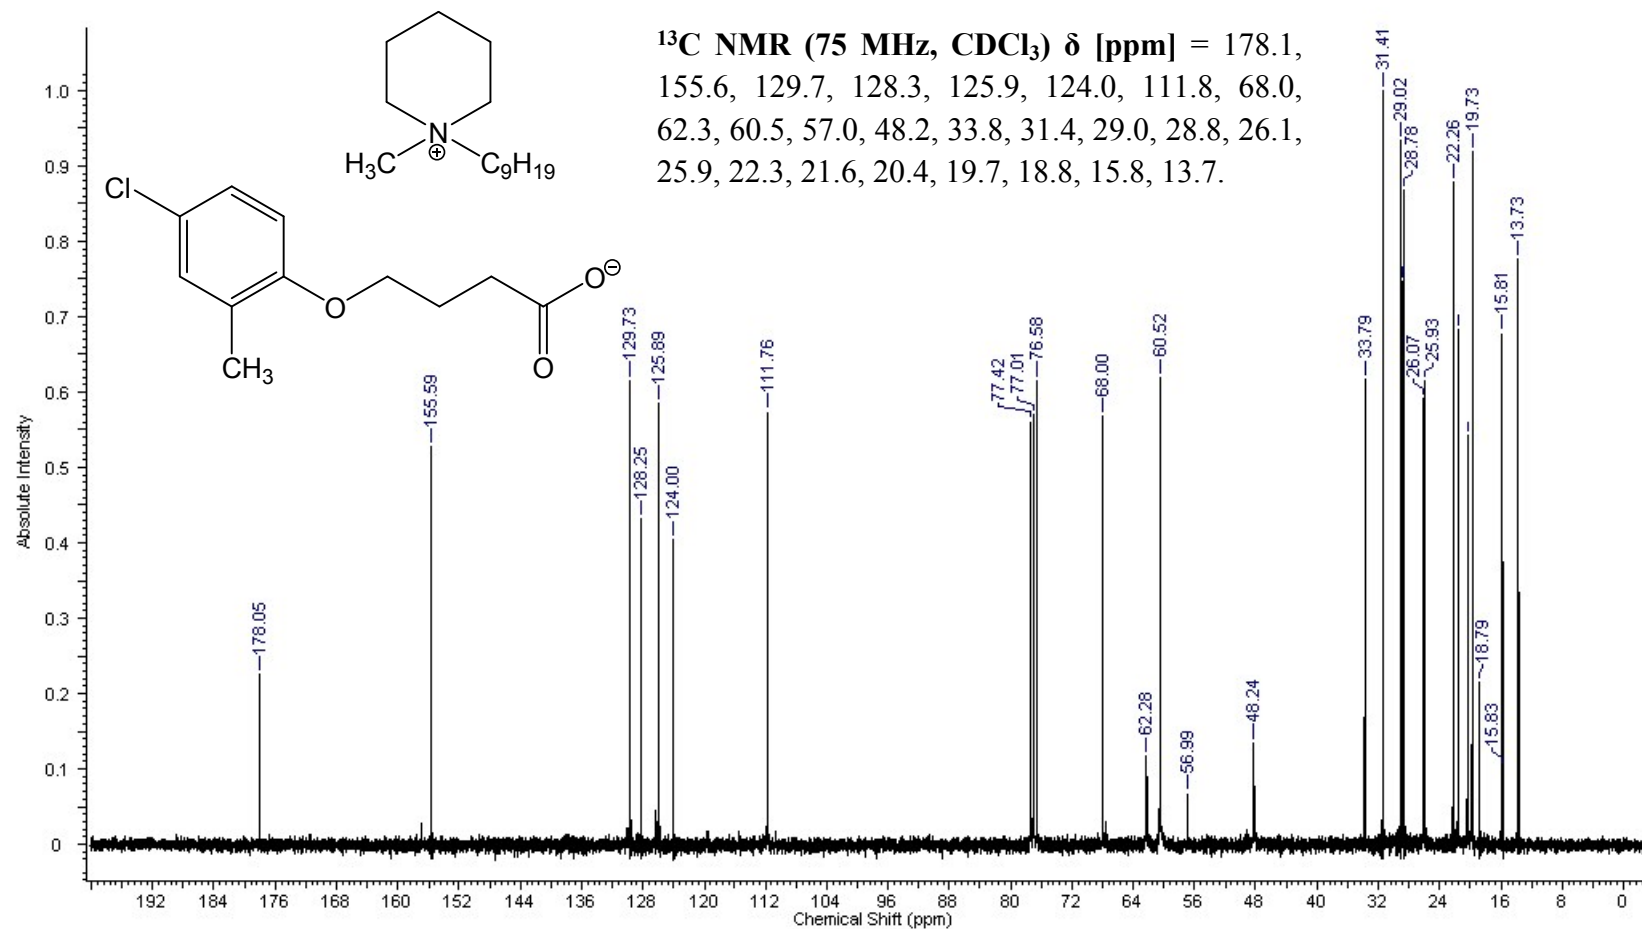

Figure S17. <sup>1</sup>H NMR spectrum of 1-decyl-1-methylpiperidinium 4-(4-chloro-2-methylphenoxy)butanoate (9).

|                        |                                                                                  |                      |               |                       |                 |                        |                     |
|------------------------|----------------------------------------------------------------------------------|----------------------|---------------|-----------------------|-----------------|------------------------|---------------------|
| Acquisition Time (sec) | 6.0000                                                                           | Comment              | [DMPip][MCPB] | Date                  | Mar 31 2014     | Date Stamp             | Mar 31 2014         |
| File Name              | C:\Documents and Settings\Mariusz\Pulpit\Niemcz\NMR\UAM\PO\DMPIP-MCPB-H1.fid\fid |                      |               |                       | Frequency (MHz) | 402.64                 |                     |
| Nucleus                | 1H                                                                               | Number of Transients | 64            | Original Points Count | 31250           | Points Count           | 32768               |
| Pulse Sequence         | s2pul                                                                            | Receiver Gain        | 20.00         | Solvent               | CHLOROFORM-d    |                        |                     |
| Spectrum Offset (Hz)   | 2323.7070                                                                        | Spectrum Type        | STANDARD      | Sweep Width (Hz)      | 5208.33         | Temperature (degree C) | AMBIENT TEMPERATURE |

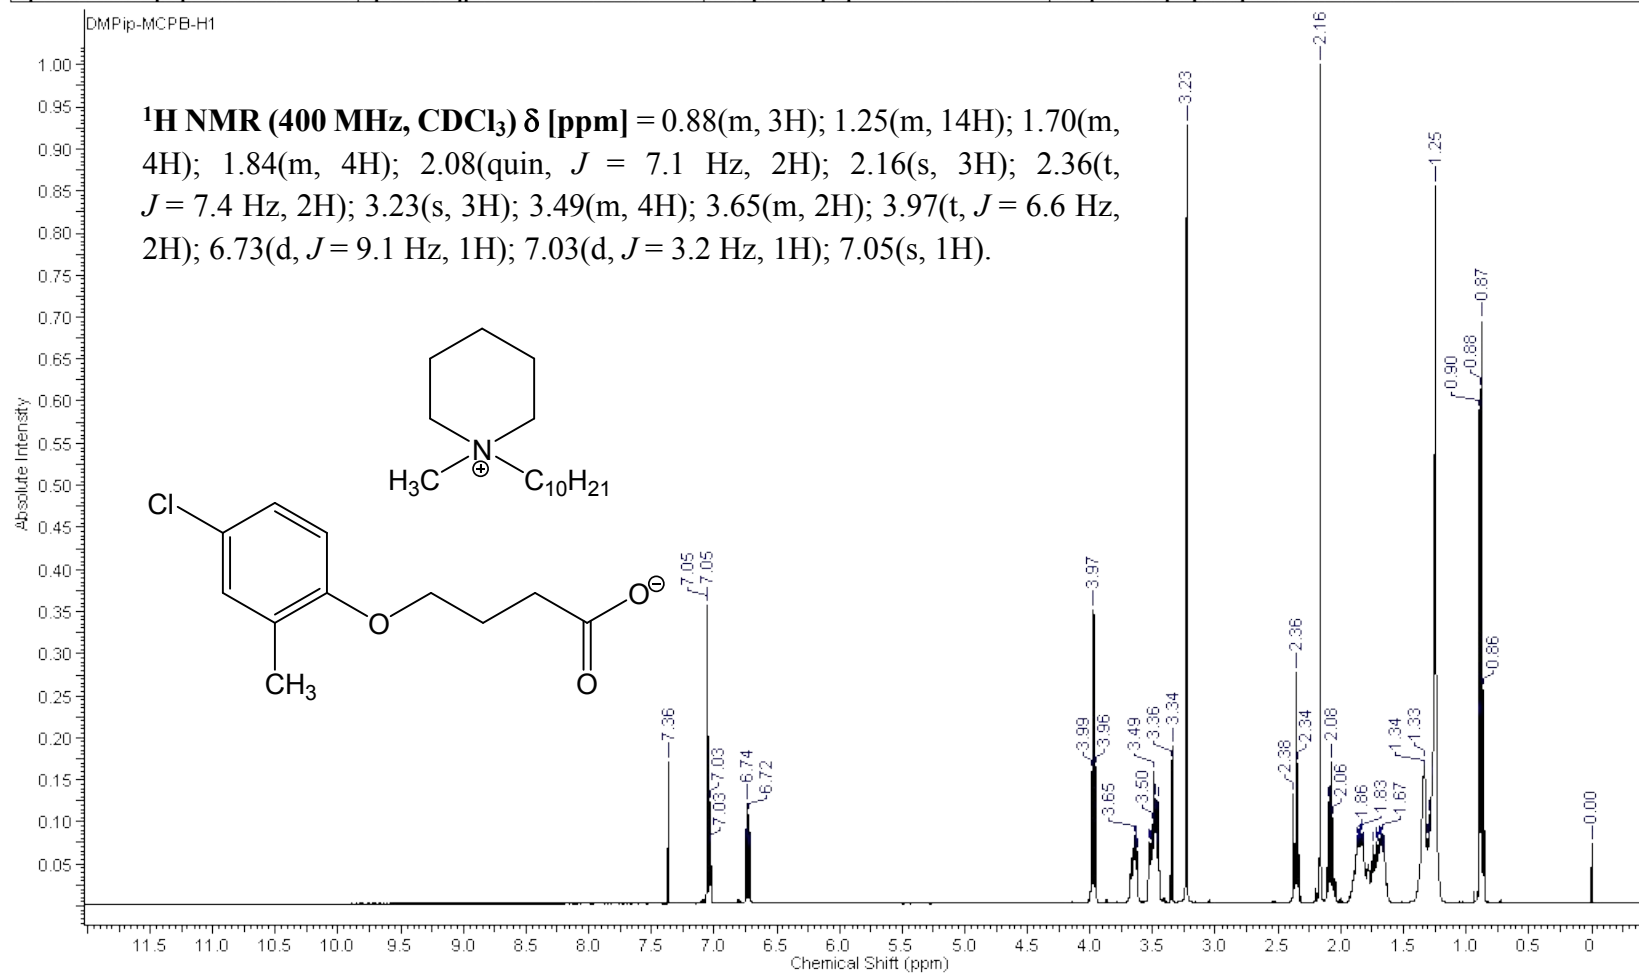

**Figure S18.**  $^{13}\text{C}$  NMR spectrum of 1-decyl-1-methylpiperidinium 4-(4-chloro-2-methylphenoxy)butanoate (**9**).

| Acquisition Time (sec) | 1.3010                                                                            | Comment              | [DMPip][MCPB] | Date                  | Mar 31 2014     | Date Stamp             | Mar 31 2014         |
|------------------------|-----------------------------------------------------------------------------------|----------------------|---------------|-----------------------|-----------------|------------------------|---------------------|
| File Name              | C:\Documents and Settings\Mariusz\Pulpit\Niemcz\NMR\JAMNPO\DMPip-MCPB-C13.fid.tif |                      |               |                       | Frequency (MHz) | 101.25                 |                     |
| Nucleus                | $^{13}\text{C}$                                                                   | Number of Transients | 940           | Original Points Count | 28038           | Points Count           | 32768               |
| Pulse Sequence         | s2pul                                                                             | Receiver Gain        | 36.00         | Solvent               | CHLOROFORM-d    |                        |                     |
| Spectrum Offset (Hz)   | 9600.5371                                                                         | Spectrum Type        | STANDARD      | Sweep Width (Hz)      | 21551.72        | Temperature (degree C) | AMBIENT TEMPERATURE |

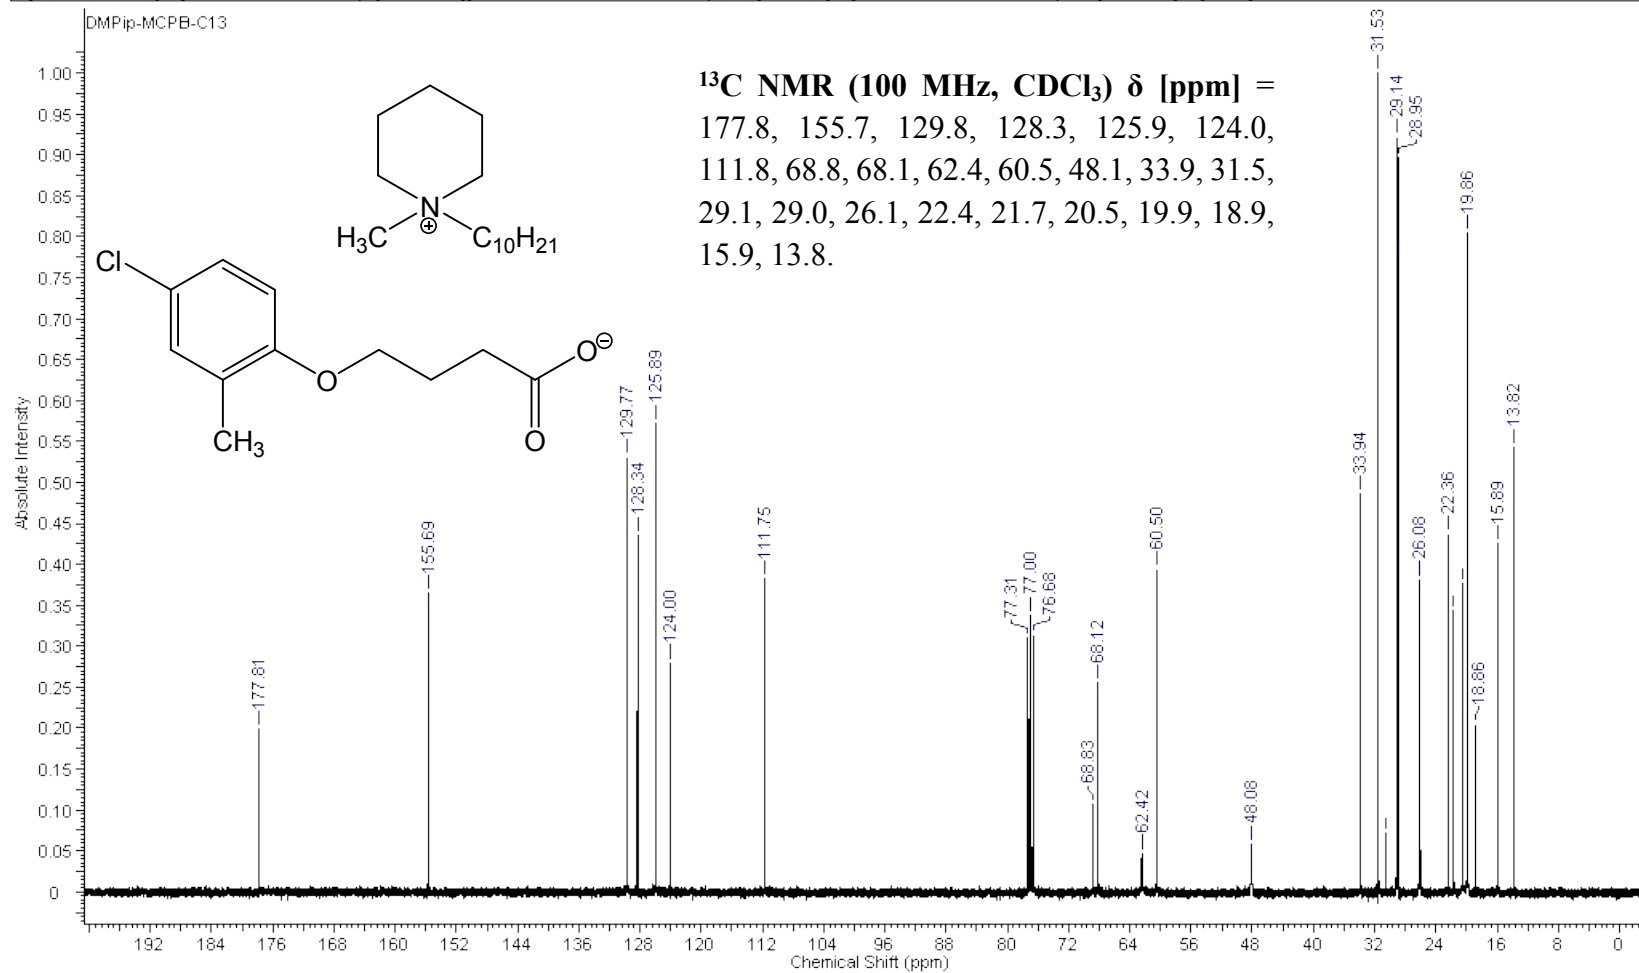

**Figure S19.**  $^1\text{H}$  NMR spectrum of 1-methyl-1-undecylpiperidinium 4-(4-chloro-2-methylphenoxy)butanoate (**10**).

| Acquisition Time (sec) | 4.0000                                                                               | Comment                | C11-MPip-MCPB       | Date                  | Apr 23 2015     | Date Stamp    | Apr 23 2015 |
|------------------------|--------------------------------------------------------------------------------------|------------------------|---------------------|-----------------------|-----------------|---------------|-------------|
| File Name              | C:\Documents and Settings\Mariusz\Pulpit\Niemcz\NMR\UJAM\POC\11-MPip-MCPB-H1.fid\fid |                        |                     |                       | Frequency (MHz) | 300.07        |             |
| Nucleus                | 1H                                                                                   | Number of Transients   | 64                  | Original Points Count | 18182           | Points Count  | 32768       |
| Pulse Sequence         | s2pul                                                                                | Solvent                | CHLOROFORM-d        | Spectrum Offset (Hz)  | 2029.9664       | Spectrum Type | STANDARD    |
| Sweep Width (Hz)       | 4545.45                                                                              | Temperature (degree C) | AMBIENT TEMPERATURE |                       |                 |               |             |

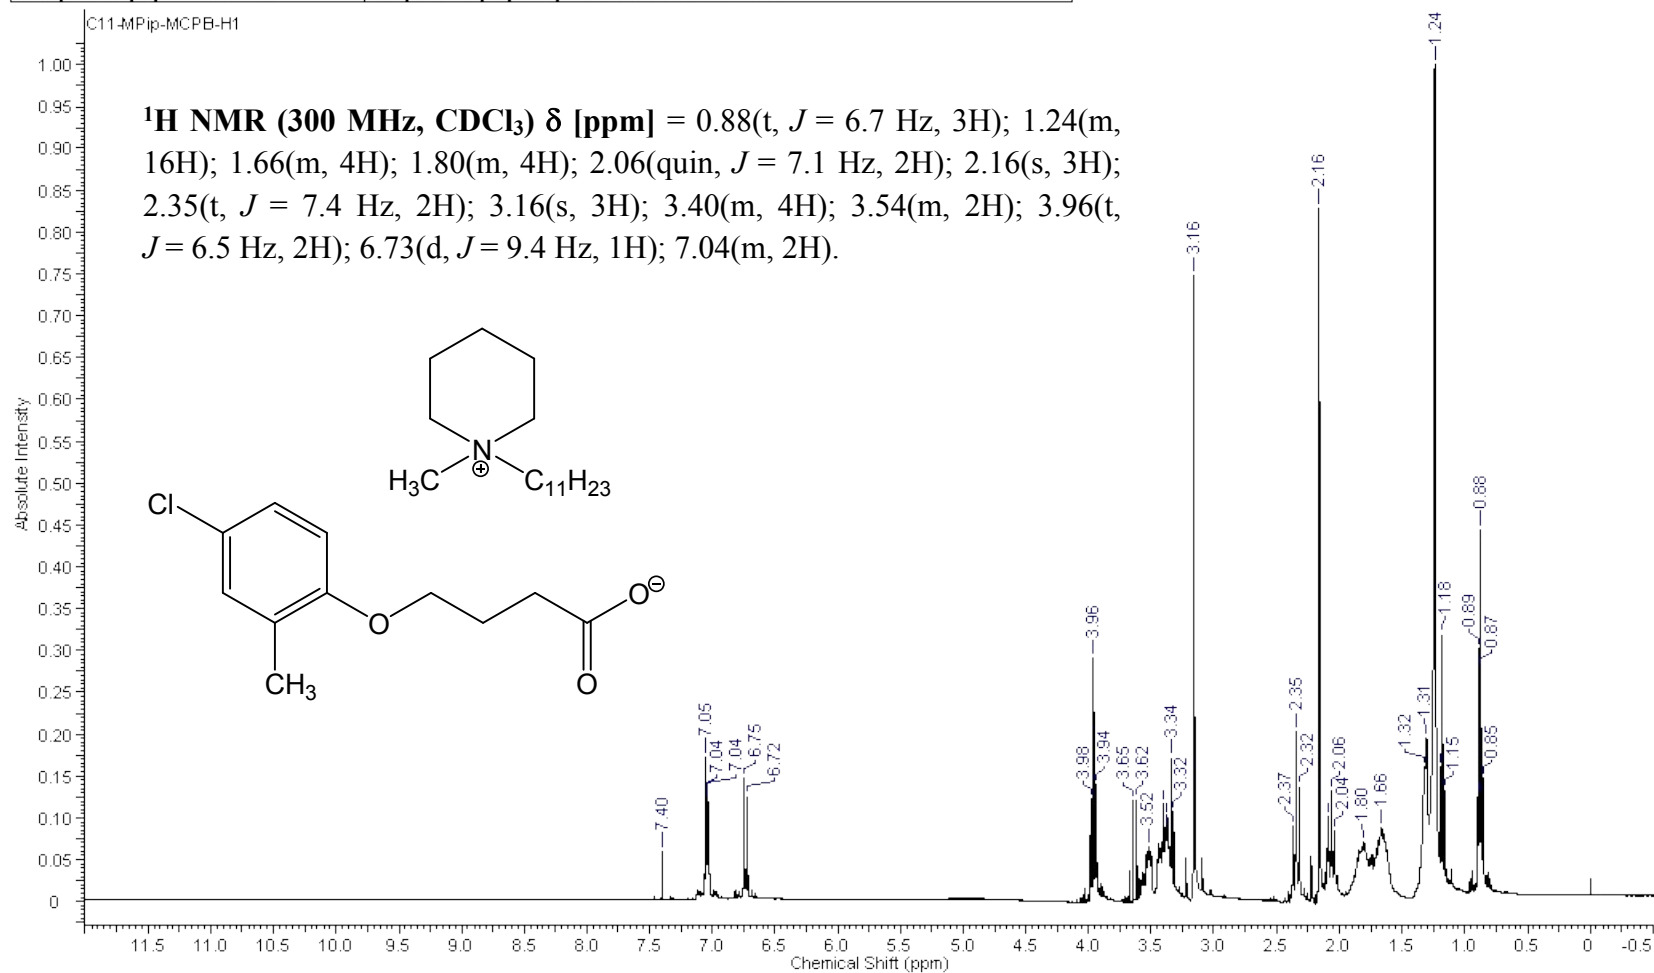

Figure S20.  $^{13}\text{C}$  NMR spectrum of 1-methyl-1-undecylpiperidinium 4-(4-chloro-2-methylphenoxy)butanoate (**10**).

|                        |                                                                                       |                      |               |                       |                 |                        |                     |
|------------------------|---------------------------------------------------------------------------------------|----------------------|---------------|-----------------------|-----------------|------------------------|---------------------|
| Acquisition Time (sec) | 0.6400                                                                                | Comment              | C11-MPip-MCPB | Date                  | Apr 23 2015     | Date Stamp             | Apr 23 2015         |
| File Name              | C:\Documents and Settings\Mariusz\Pulpit\Niemcz\NMR\UJAM\PO\C11-MPip-MCPB-c13.fid\fid |                      |               |                       | Frequency (MHz) | 75.46                  |                     |
| Nucleus                | $^{13}\text{C}$                                                                       | Number of Transients | 1572          | Original Points Count | 10257           | Points Count           | 16384               |
| Pulse Sequence         | s2pul                                                                                 | Receiver Gain        | 34.00         | Solvent               | CHLOROFORM-d    |                        |                     |
| Spectrum Offset (Hz)   | 7086.8291                                                                             | Spectrum Type        | STANDARD      | Sweep Width (Hz)      | 16025.64        | Temperature (degree C) | AMBIENT TEMPERATURE |

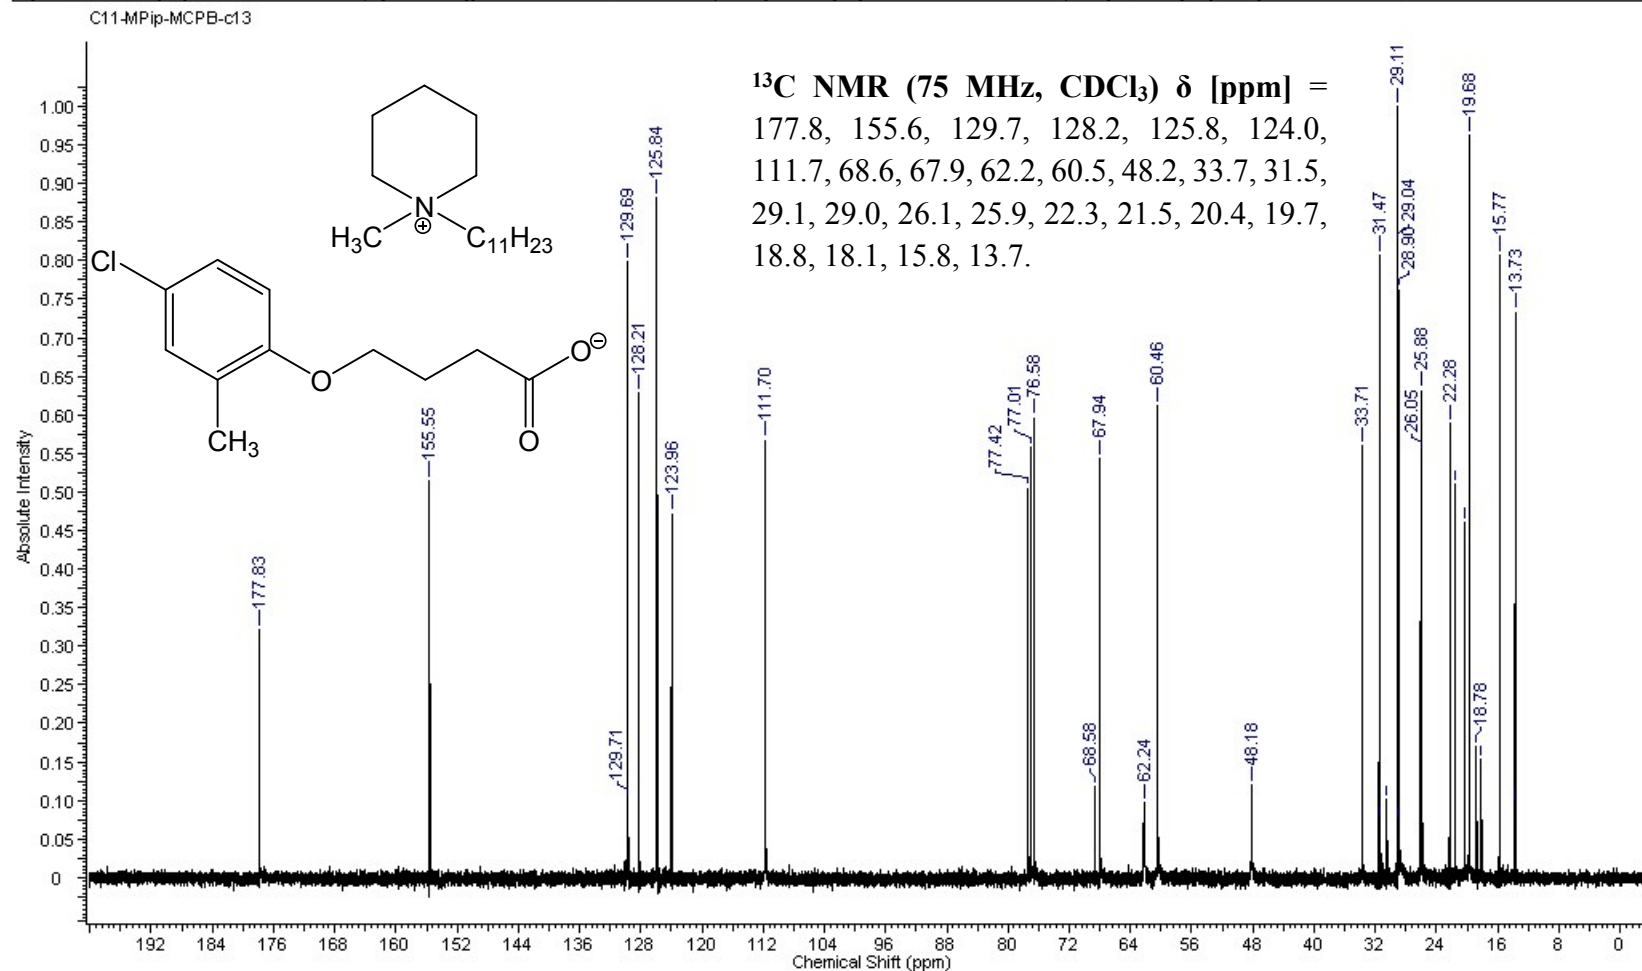

**Figure S21.**  $^1\text{H}$  NMR spectrum of 1-dodecyl-1-methylpiperidinium 4-(4-chloro-2-methylphenoxy)butanoate (**11**).

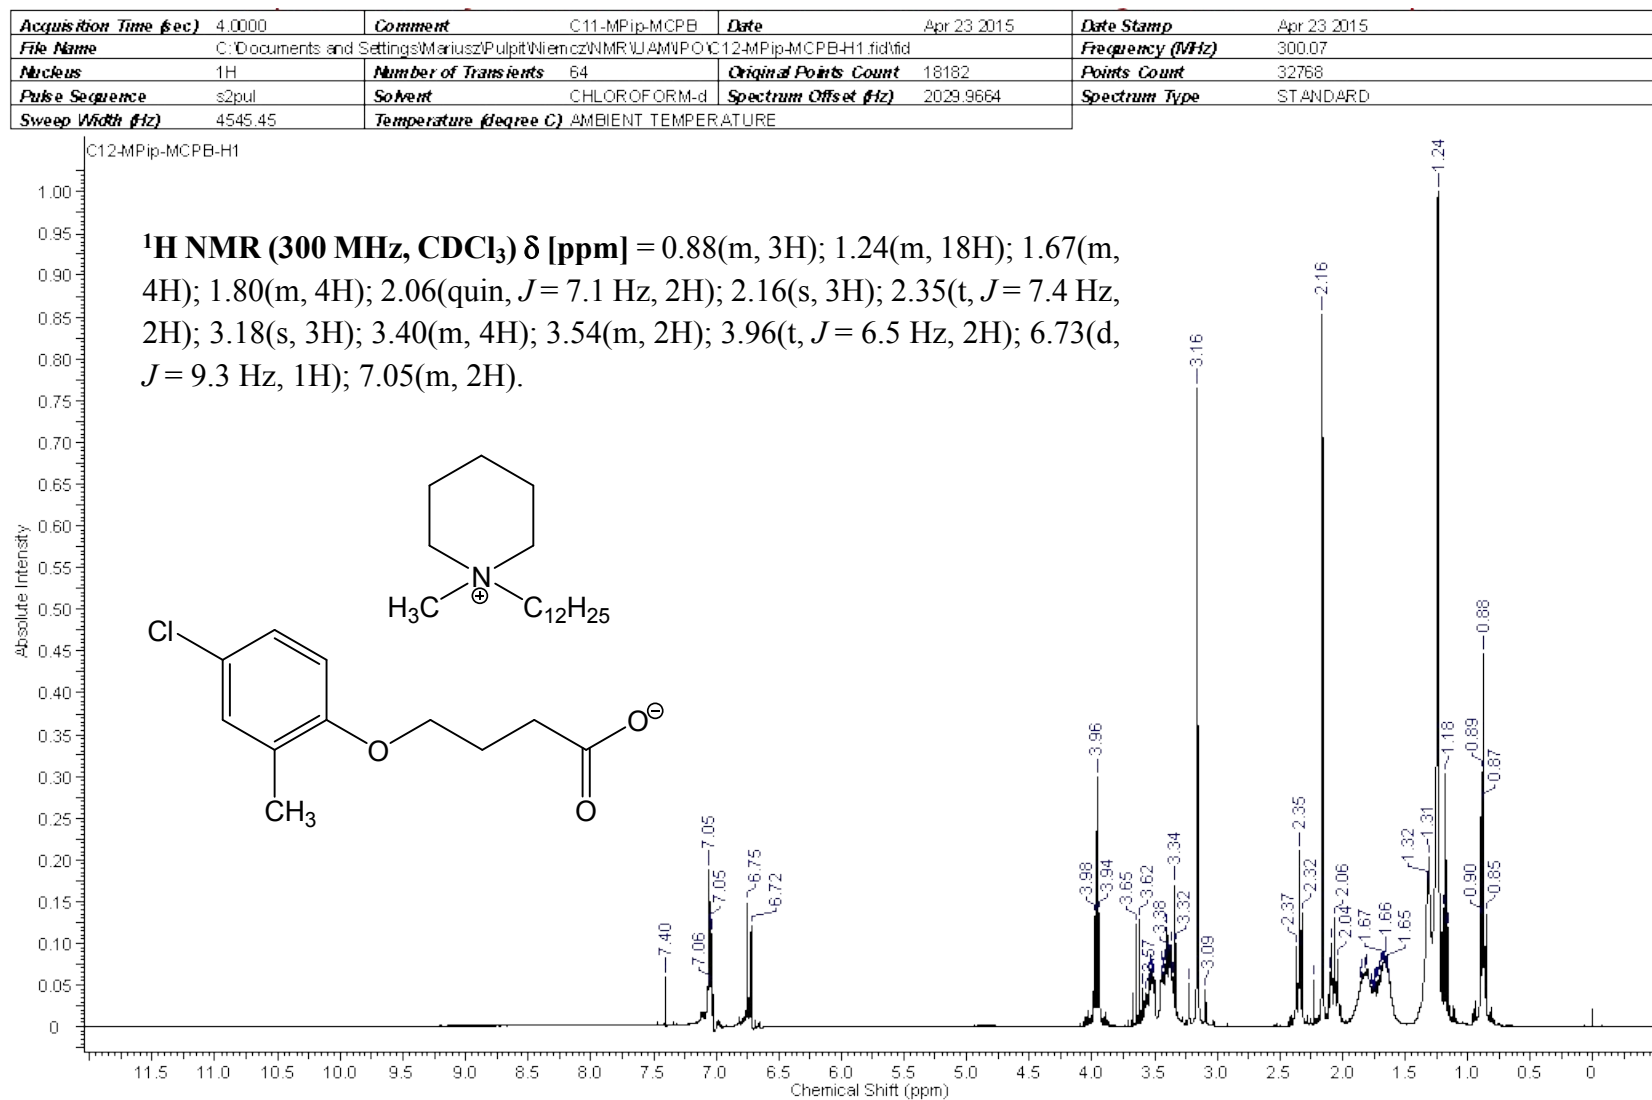



Figure S22.  $^{13}\text{C}$  NMR spectrum of 1-dodecyl-1-methylpiperidinium 4-(4-chloro-2-methylphenoxy)butanoate (**11**).

|                        |                                                                                     |                      |              |                       |                 |                        |                     |
|------------------------|-------------------------------------------------------------------------------------|----------------------|--------------|-----------------------|-----------------|------------------------|---------------------|
| Acquisition Time (sec) | 0.6400                                                                              | Comment              | C12MPip-MCPB | Date                  | Apr 23 2015     | Date Stamp             | Apr 23 2015         |
| File Name              | C:\Documents and Settings\Mariusz\Pulpit\Niemcz\NMR\UAM\PO\C12MPip-MCPB-c13.fid\fid |                      |              |                       | Frequency (MHz) | 75.46                  |                     |
| Nucleus                | $^{13}\text{C}$                                                                     | Number of Transients | 800          | Original Points Count | 10257           | Points Count           | 16384               |
| Pulse Sequence         | s2pul                                                                               | Receiver Gain        | 34.00        | Solvent               | CHLOROFORM-d    |                        |                     |
| Spectrum Offset (Hz)   | 7092.6973                                                                           | Spectrum Type        | STANDARD     | Sweep Width (Hz)      | 16025.64        | Temperature (degree C) | AMBIENT TEMPERATURE |

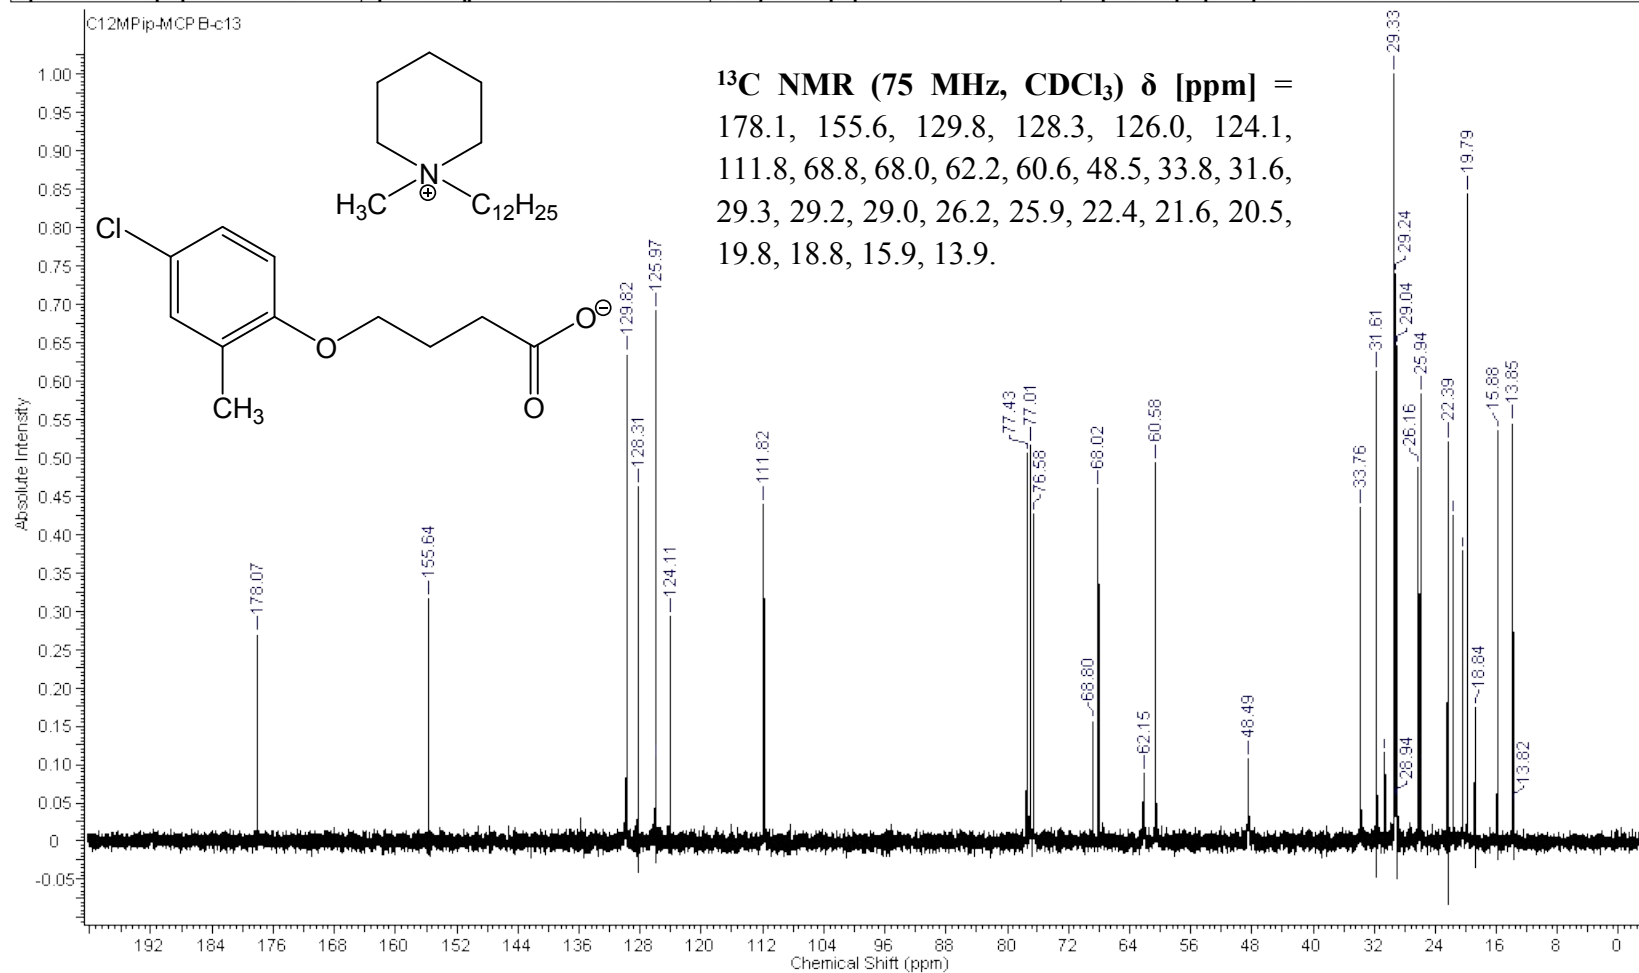

**Figure S23.**  $^1\text{H}$  NMR spectrum of 1-methyl-1-tetradecylpiperidinium 4-(4-chloro-2-methylphenoxy)butanoate (**12**).

|                        |             |                  |                                                                                  |                        |                     |                       |           |
|------------------------|-------------|------------------|----------------------------------------------------------------------------------|------------------------|---------------------|-----------------------|-----------|
| Acquisition Time (sec) | 4.0002      | Comment          | [C14-MPip][MCPB]                                                                 |                        | Date                | Apr 24 2015           |           |
| Date Stamp             | Apr 24 2015 | File Name        | C:\Documents and Settings\Mariusz\Pulpit\Niemcz\NMR\UAM\POVC14-MPip-MCPB.fid\fid |                        |                     |                       |           |
| Frequency (MHz)        | 300.07      | Nucleus          | 1H                                                                               | Number of Transients   | 64                  | Original Points Count | 23311     |
| Points Count           | 32768       | Pulse Sequence   | s2pul                                                                            | Solvent                | CHLOROFORM-d        | Spectrum Offset (Hz)  | 2281.2554 |
| Spectrum Type          | STANDARD    | Sweep Width (Hz) | 5827.51                                                                          | Temperature (degree C) | AMBIENT TEMPERATURE |                       |           |

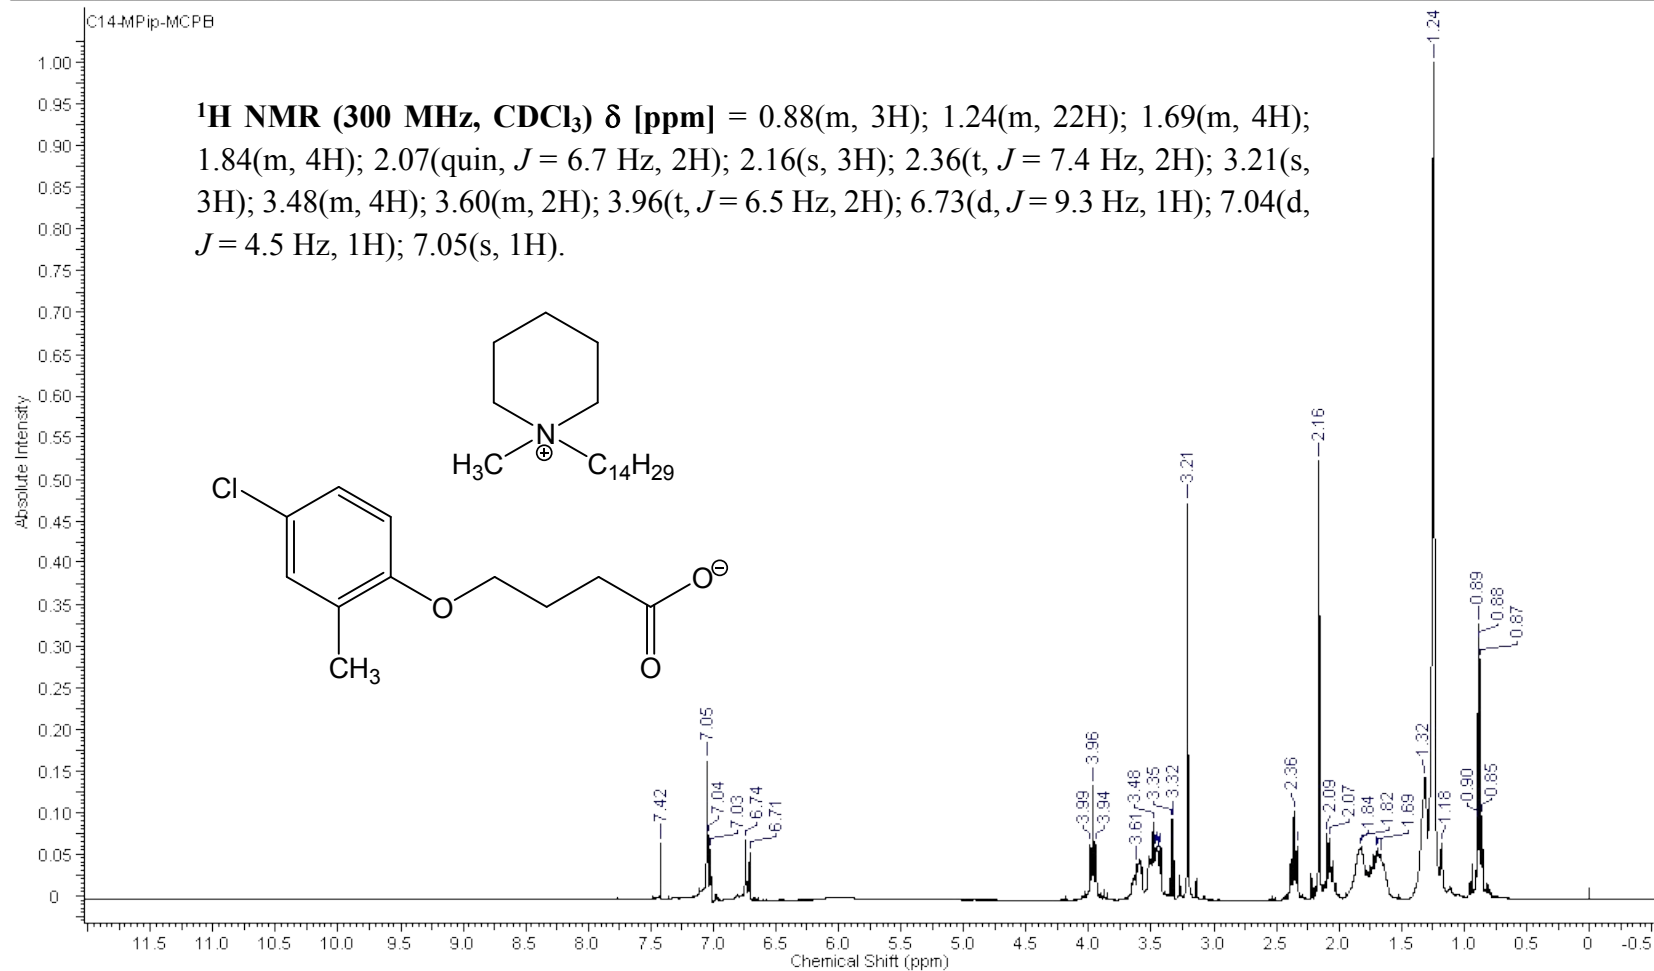

Figure S24.  $^{13}\text{C}$  NMR spectrum of 1-methyl-1-tetradecylpiperidinium 4-(4-chloro-2-methylphenoxy)butanoate (12).

|                        |             |                |                                                                                      |                      |          |                        |                     |
|------------------------|-------------|----------------|--------------------------------------------------------------------------------------|----------------------|----------|------------------------|---------------------|
| Acquisition Time (sec) | 0.6400      | Comment        | [C14-MPip][MCPB]                                                                     |                      | Date     | Apr 24 2015            |                     |
| Date Stamp             | Apr 24 2015 | File Name      | C:\Documents and Settings\Mariusz\Pulpit\Niemcz\NMR\UAM\POC\14-MPip-MCPB-C13.fid\fid |                      |          |                        |                     |
| Frequency (MHz)        | 75.46       | Nucleus        | $^{13}\text{C}$                                                                      | Number of Transients | 1232     | Original Points Count  | 10257               |
| Points Count           | 16384       | Pulse Sequence | s2pul                                                                                | Receiver Gain        | 34.00    | Solvent                | CHLOROFORM-d        |
| Spectrum Offset (Hz)   | 7190.5166   | Spectrum Type  | STANDARD                                                                             | Sweep Width (Hz)     | 16025.64 | Temperature (degree C) | AMBIENT TEMPERATURE |

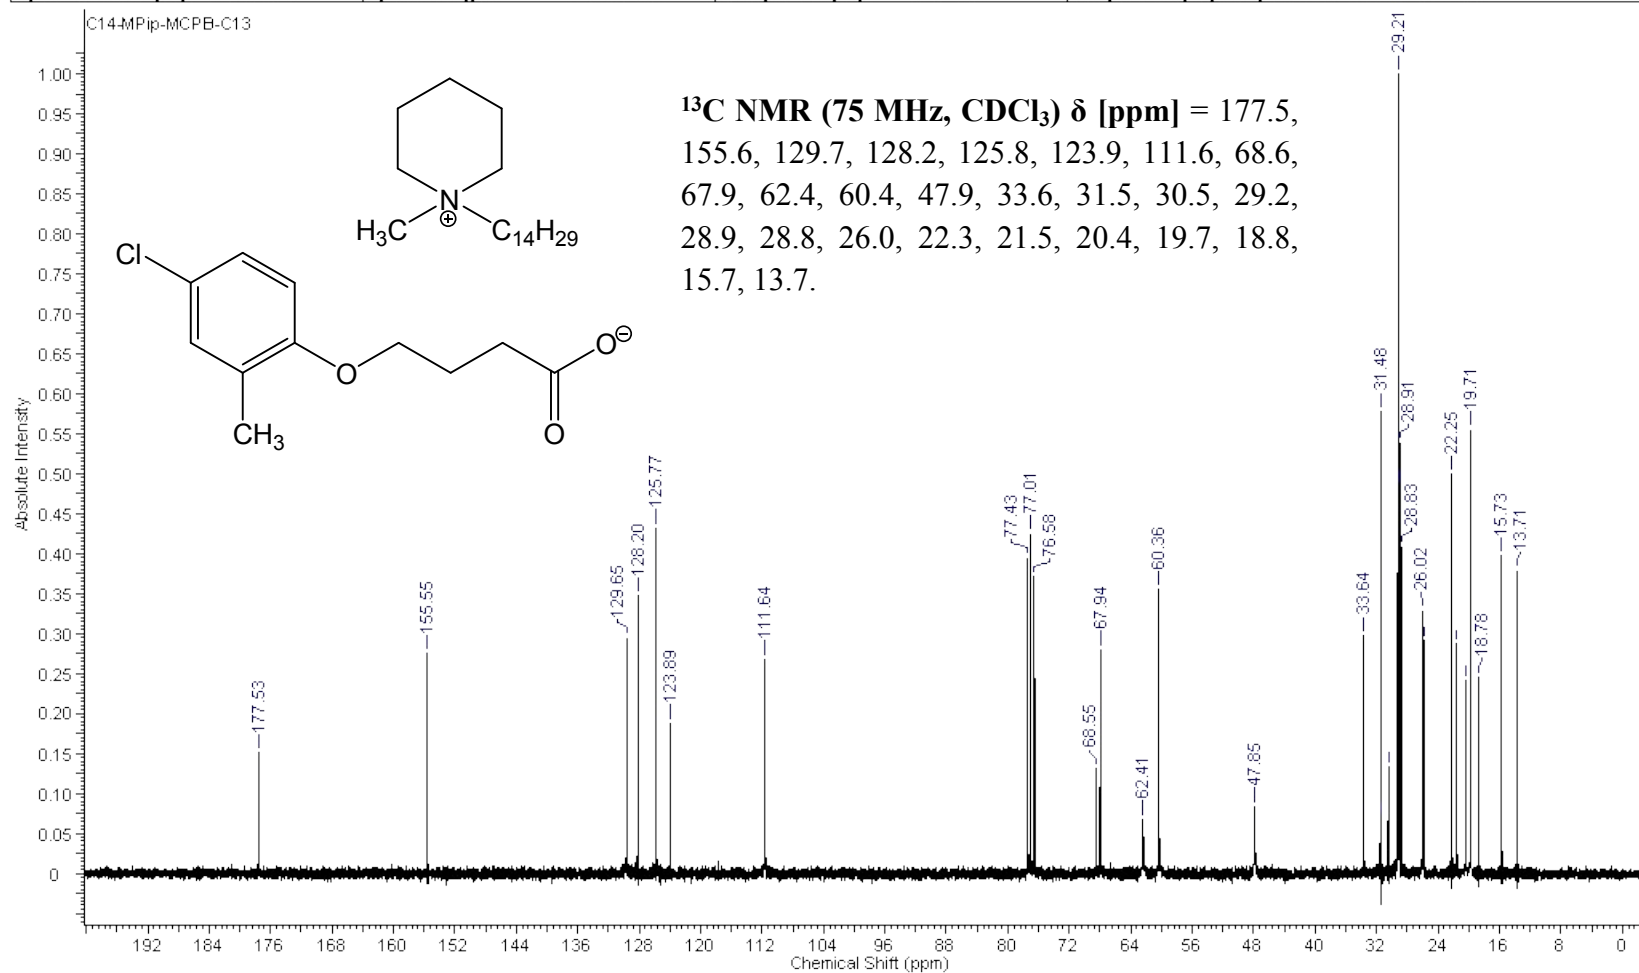

**Figure S25.**  $^1\text{H}$  NMR spectrum of 1-hexadecyl-1-methylpiperidinium 4-(4-chloro-2-methylphenoxy)butanoate (**13**).

|                        |             |                |                                                                              |                        |                     |
|------------------------|-------------|----------------|------------------------------------------------------------------------------|------------------------|---------------------|
| Acquisition Time (sec) | 4.5000      | Comment        | [HDMPip].[MCPB]                                                              | Date                   | Mar 28 2014         |
| Date Stamp             | Mar 28 2014 | File Name      | C:\Documents and Settings\Mariusz Pupa\Niemcz\NMR\JAM\PO\HDMPip-MCPB.fid\fid |                        |                     |
| Frequency (MHz)        | 402.64      | Nucleus        | $^1\text{H}$                                                                 | Number of Transients   | 64                  |
| Points Count           | 32768       | Pulse Sequence | s2pul                                                                        | Receiver Gain          | 20.00               |
| Spectrum Offset (Hz)   | 2917.4609   | Spectrum Type  | STANDARD                                                                     | Sweep Width (Hz)       | 6410.26             |
|                        |             |                |                                                                              | Original Points Count  | 28846               |
|                        |             |                |                                                                              | Solvent                | CHLOROFORM-d        |
|                        |             |                |                                                                              | Temperature (degree C) | AMBIENT TEMPERATURE |

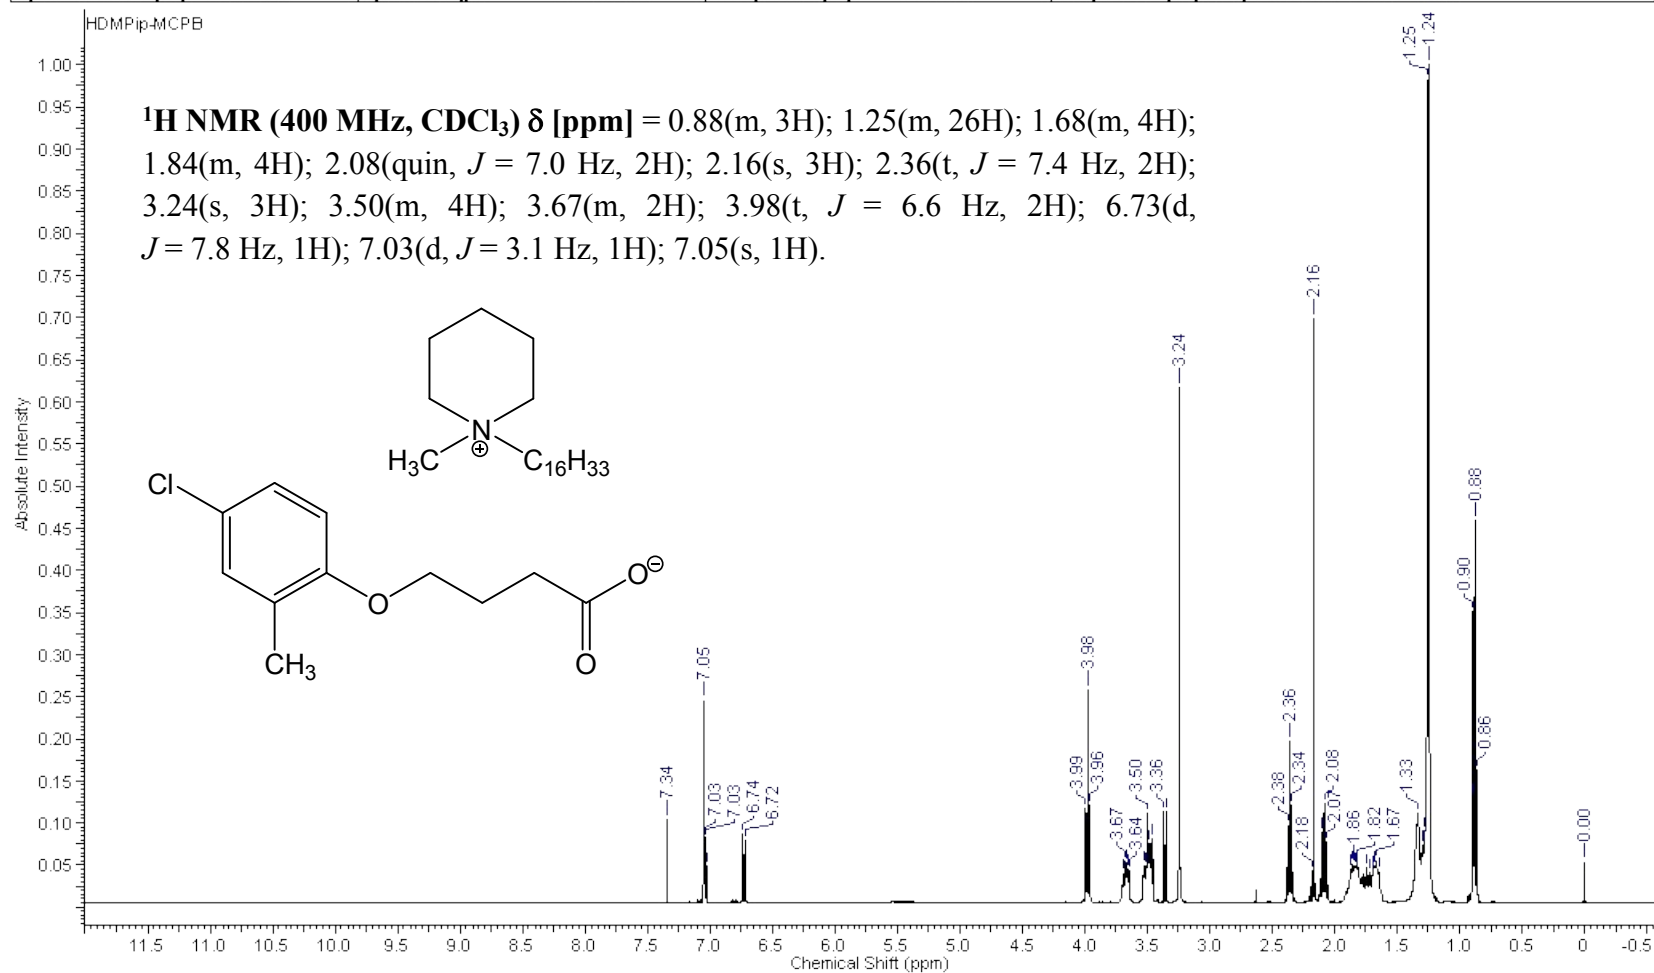

Figure S26.  $^{13}\text{C}$  NMR spectrum of 1-hexadecyl-1-methylpiperidinium 4-(4-chloro-2-methylphenoxy)butanoate (**13**).

|                        |             |                |                                                                                    |                        |                     |
|------------------------|-------------|----------------|------------------------------------------------------------------------------------|------------------------|---------------------|
| Acquisition Time (sec) | 1.3010      | Comment        | [HDMPip] [MCPB]                                                                    | Date                   | Mar 28 2014         |
| Date Stamp             | Mar 28 2014 | File Name      | C:\Documents and Settings\Mariusz Pulpit\Niemcz\NMR\UAM\PO\HDMPip-MCPB-C13.fid\fid |                        |                     |
| Frequency (MHz)        | 101.25      | Nucleus        | $^{13}\text{C}$                                                                    | Number of Transients   | 604                 |
| Points Count           | 32768       | Pulse Sequence | s2pul                                                                              | Receiver Gain          | 36.00               |
| Spectrum Offset (Hz)   | 9605.7988   | Spectrum Type  | STANDARD                                                                           | Sweep Width (Hz)       | 21551.72            |
|                        |             |                |                                                                                    | Solvent                | CHLOROFORM-d        |
|                        |             |                |                                                                                    | Temperature (degree C) | AMBIENT TEMPERATURE |

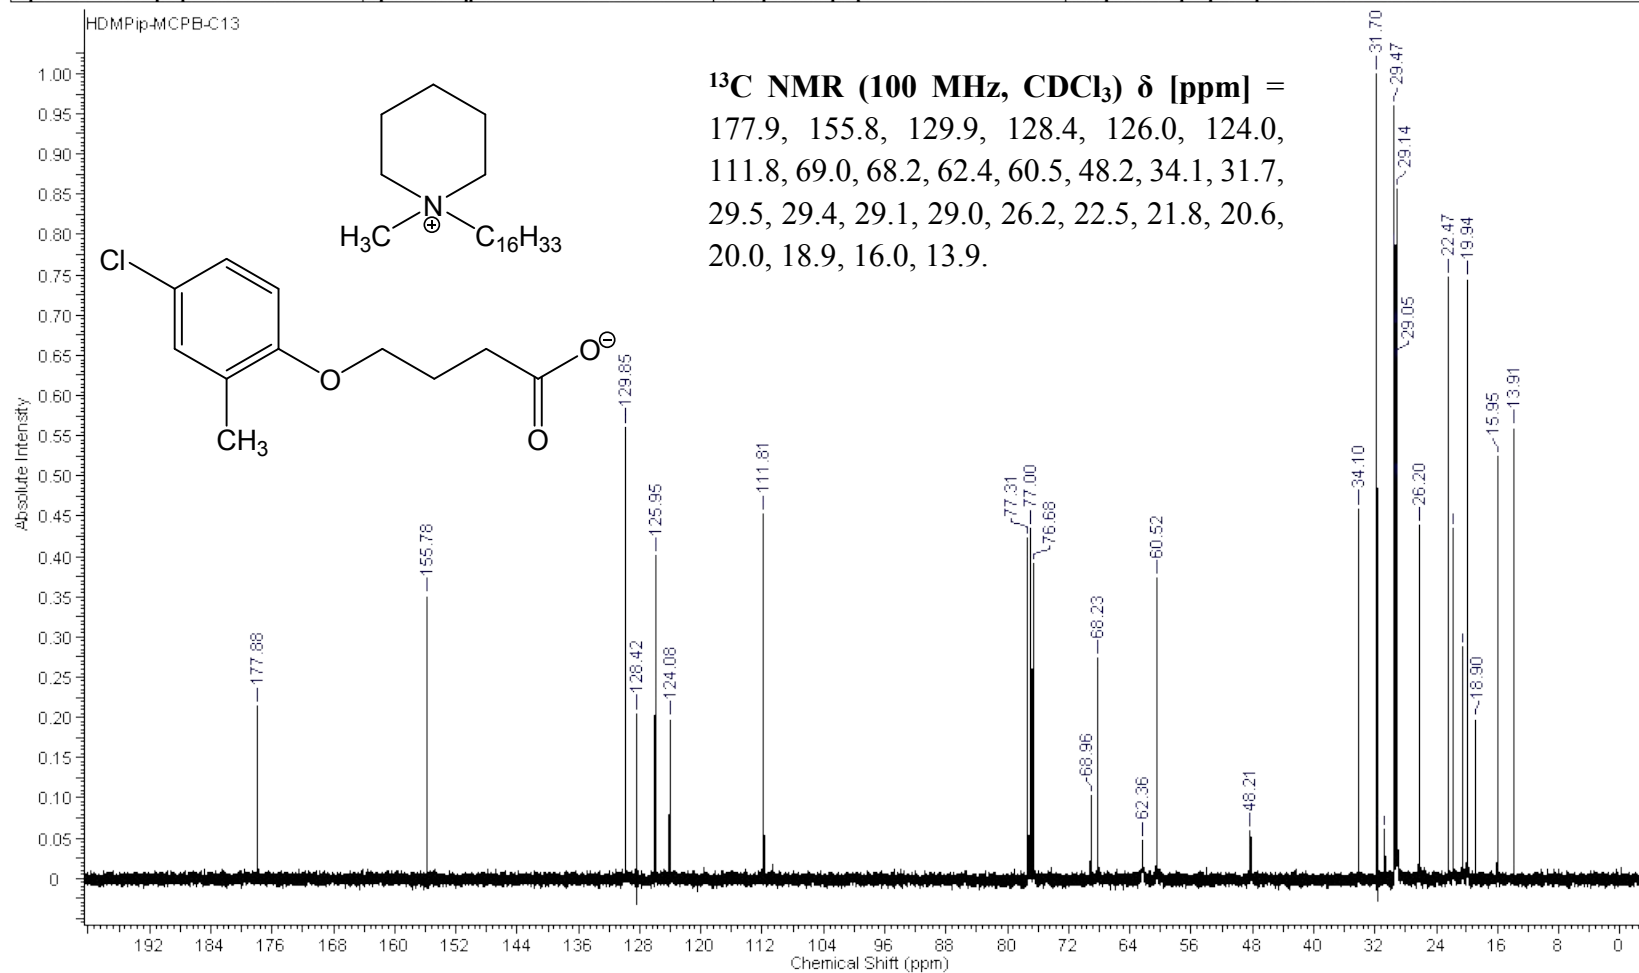

Figure S27. <sup>1</sup>H NMR spectrum of 1-methyl-1-octadecylpiperidinium 4-(4-chloro-2-methylphenoxy)butanoate (**14**).

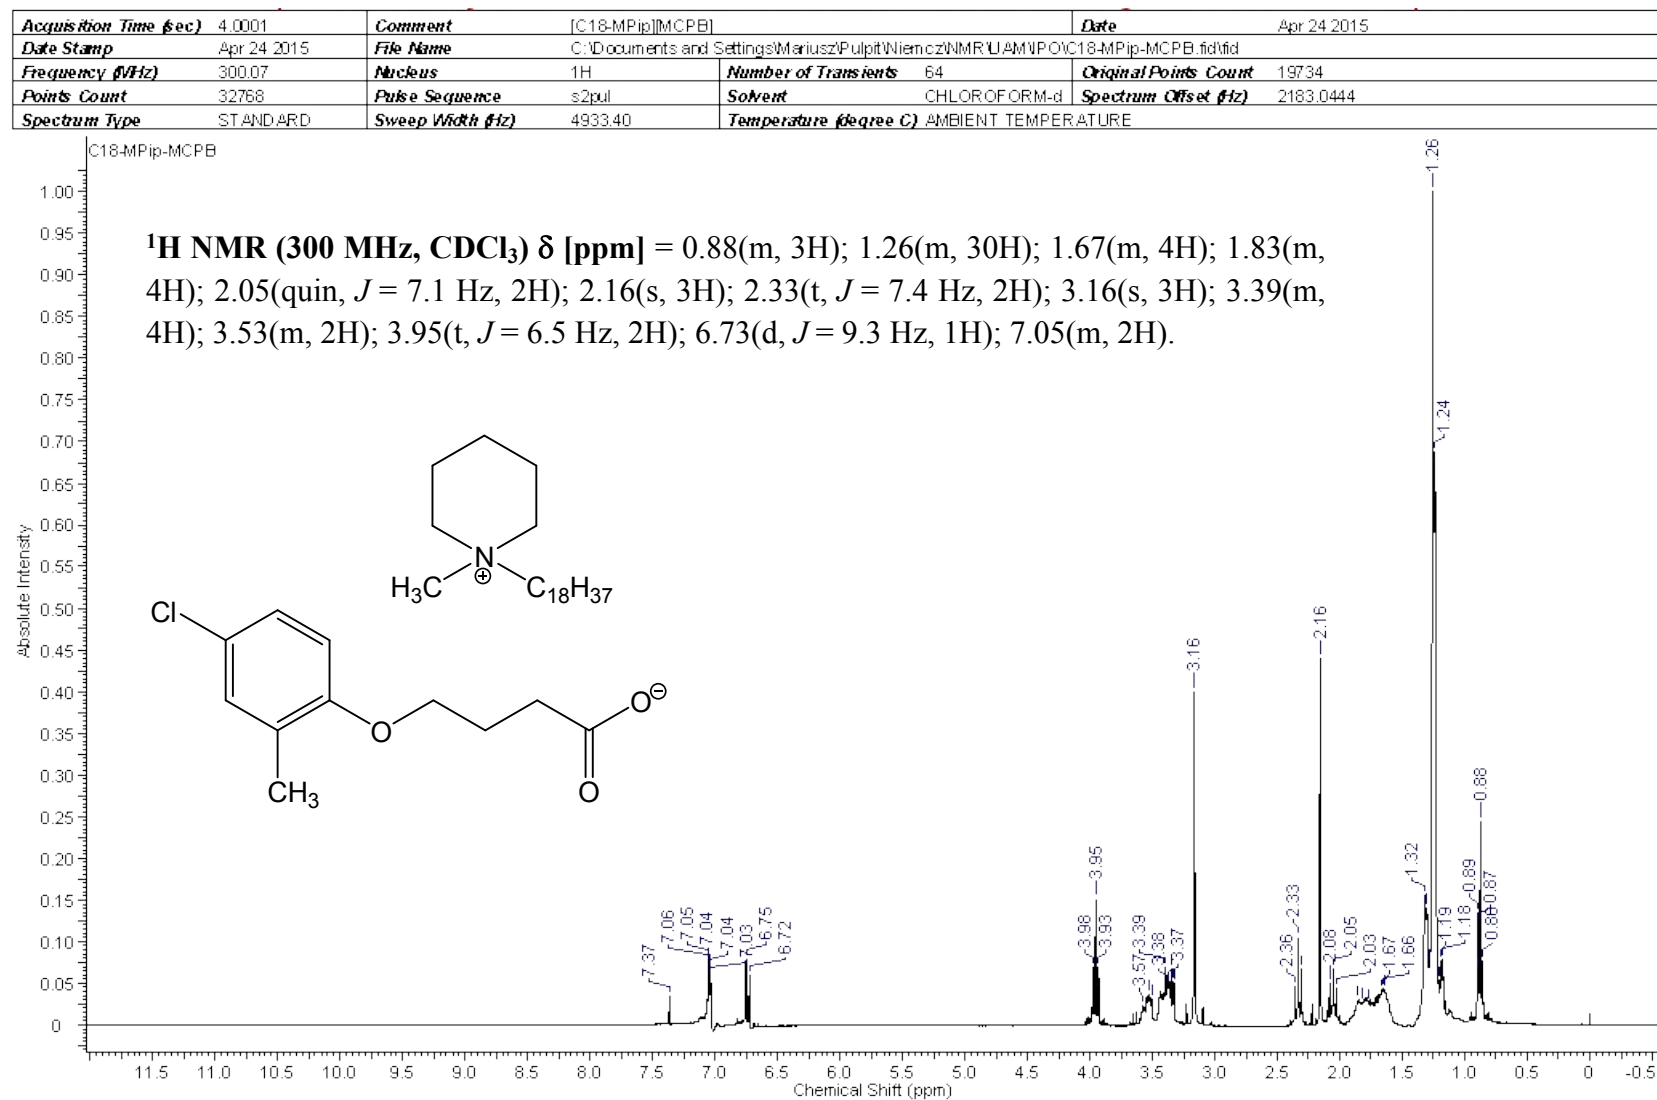

**Figure S28.**  $^{13}\text{C}$  NMR spectrum of 1-methyl-1-octadecylpiperidinium 4-(4-chloro-2-methylphenoxy)butanoate (**14**).

|                               |             |                       |                                                                                        |                             |             |                               |                     |
|-------------------------------|-------------|-----------------------|----------------------------------------------------------------------------------------|-----------------------------|-------------|-------------------------------|---------------------|
| <i>Acquisition Time (sec)</i> | 0.6400      | <i>Comment</i>        | [C18-MPip][MCPB]                                                                       |                             | <i>Date</i> | Apr 24 2015                   |                     |
| <i>Date Stamp</i>             | Apr 24 2015 | <i>File Name</i>      | C:\Documents and Settings\Mariusz\Pulpit\Nienecz\NMR\JAM\PO\VC18-MPip-MCPB-C13.fid\fid |                             |             |                               |                     |
| <i>Frequency (MHz)</i>        | 75.46       | <i>Nucleus</i>        | $^{13}\text{C}$                                                                        | <i>Number of Transients</i> | 1716        | <i>Original Points Count</i>  | 10257               |
| <i>Points Count</i>           | 16384       | <i>Pulse Sequence</i> | s2pul                                                                                  | <i>Receiver Gain</i>        | 34.00       | <i>Solvent</i>                | CHLOROFORM-d        |
| <i>Spectrum Offset (Hz)</i>   | 7196.3853   | <i>Spectrum Type</i>  | STANDARD                                                                               | <i>Sweep Width (Hz)</i>     | 16025.64    | <i>Temperature (degree C)</i> | AMBIENT TEMPERATURE |

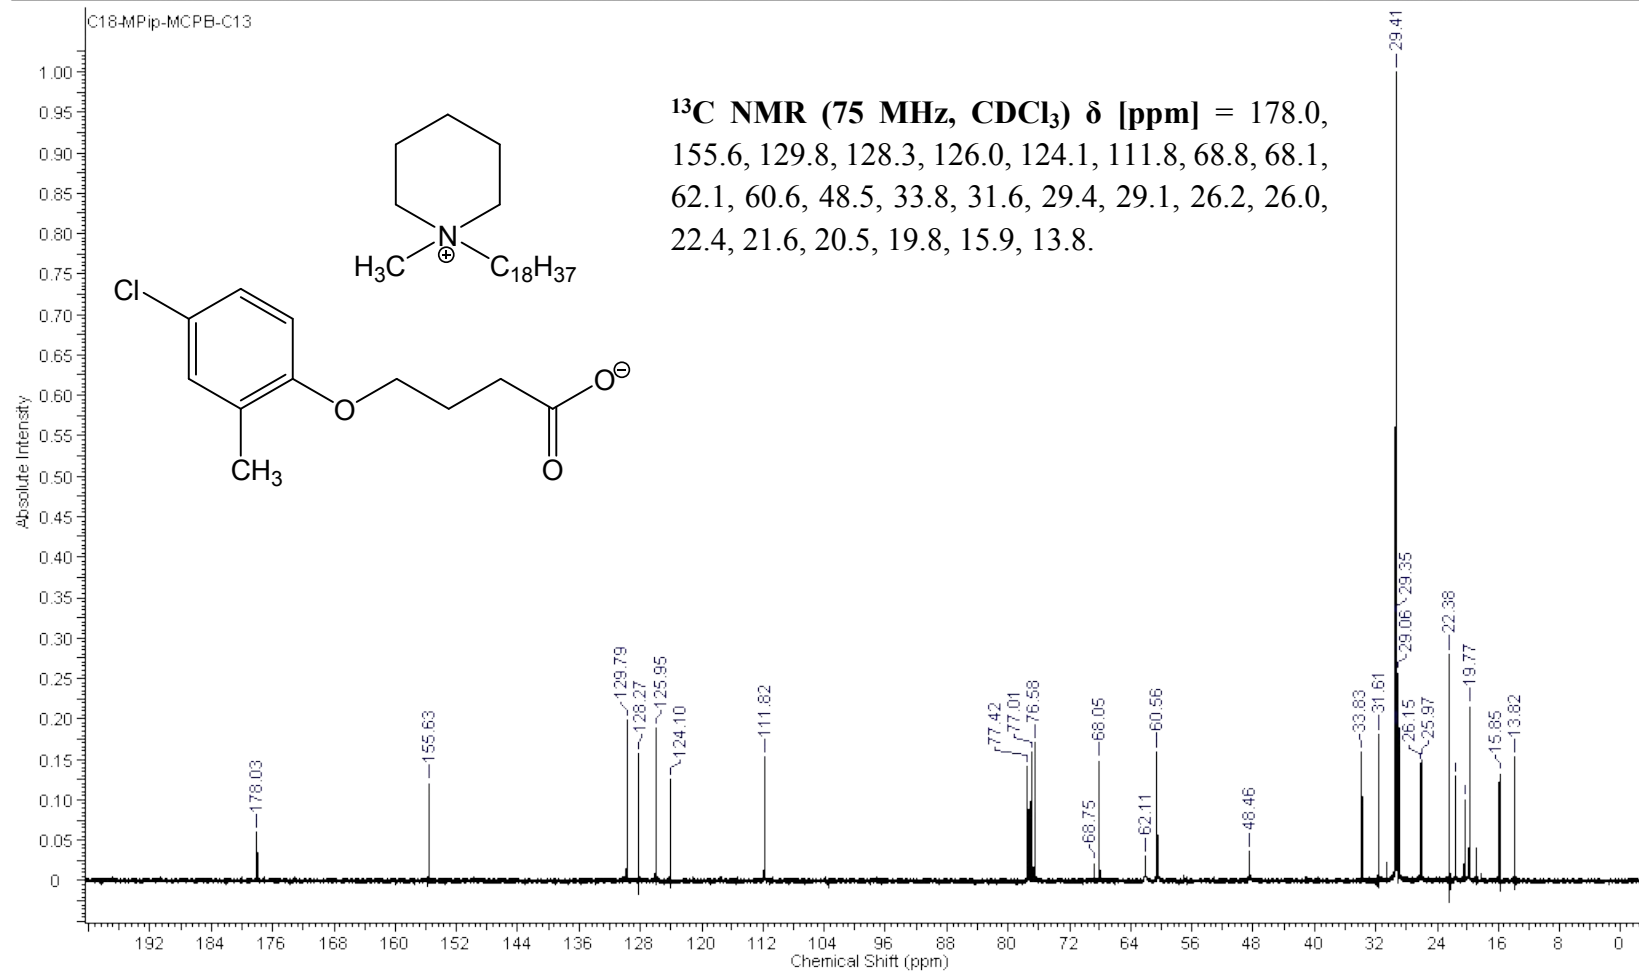

**Table S1.** Viscosity values (Pa·s) for of the HILs (5-10)

| HIL | R                               | Temperature [°C] |        |        |        |        |        |        |
|-----|---------------------------------|------------------|--------|--------|--------|--------|--------|--------|
|     |                                 | 20               | 30     | 40     | 50     | 60     | 70     | 80     |
| 5   | C <sub>6</sub> H <sub>13</sub>  | 1.4293           | 0.5685 | 0.2646 | 0.1359 | 0.0821 | 0.0559 | 0.0426 |
| 6   | C <sub>7</sub> H <sub>15</sub>  | 1.5138           | 0.4896 | 0.2266 | 0.1355 | 0.0800 | 0.0502 | 0.0406 |
| 7   | C <sub>8</sub> H <sub>17</sub>  | 2.2696           | 0.8712 | 0.3842 | 0.1827 | 0.1083 | 0.0701 | 0.0535 |
| 8   | C <sub>9</sub> H <sub>19</sub>  | 1.5092           | 0.6217 | 0.2857 | 0.1492 | 0.0861 | 0.0568 | 0.0422 |
| 9   | C <sub>10</sub> H <sub>21</sub> | 13.0937          | 1.3535 | 0.4887 | 0.2520 | 0.1383 | 0.0840 | 0.0578 |
| 10  | C <sub>11</sub> H <sub>23</sub> | 1.6705           | 0.6456 | 0.3122 | 0.1650 | 0.1036 | 0.0673 | 0.0519 |

**Table S2.** Density values (g·cm<sup>-3</sup>) for of the HILs (5-10)

| HIL | R                               | Temperature [°C] |         |         |         |         |         |         |
|-----|---------------------------------|------------------|---------|---------|---------|---------|---------|---------|
|     |                                 | 20               | 30      | 40      | 50      | 60      | 70      | 80      |
| 5   | C <sub>6</sub> H <sub>13</sub>  | 1.10650          | 1.09956 | 1.09280 | 1.08587 | 1.07875 | 1.07147 | 1.06420 |
| 6   | C <sub>7</sub> H <sub>15</sub>  | 1.09183          | 1.08484 | 1.07798 | 1.07104 | 1.06401 | 1.05703 | 1.04988 |
| 7   | C <sub>8</sub> H <sub>17</sub>  | 1.08652          | 1.07973 | 1.07325 | 1.06664 | 1.05968 | 1.05256 | 1.04539 |
| 8   | C <sub>9</sub> H <sub>19</sub>  | 1.07489          | 1.06795 | 1.06107 | 1.05414 | 1.04724 | 1.04034 | 1.03304 |
| 9   | C <sub>10</sub> H <sub>21</sub> | 1.06717          | 1.06039 | 1.05409 | 1.04732 | 1.04038 | 1.03344 | 1.02621 |
| 10  | C <sub>11</sub> H <sub>23</sub> | 1.05584          | 1.04955 | 1.04254 | 1.03559 | 1.02868 | 1.02155 | 1.01441 |

**Table S3.** Refractive index values for of the HILs (5-10)

| HIL | R                               | Temperature [°C] |         |         |         |         |         |         |
|-----|---------------------------------|------------------|---------|---------|---------|---------|---------|---------|
|     |                                 | 20               | 30      | 40      | 50      | 60      | 70      | 80      |
| 5   | C <sub>6</sub> H <sub>13</sub>  | 1.51434          | 1.51118 | 1.50801 | 1.50485 | 1.50169 | 1.49961 | 1.49706 |
| 6   | C <sub>7</sub> H <sub>15</sub>  | 1.51291          | 1.50973 | 1.50657 | 1.50335 | 1.50017 | 1.49733 | 1.49492 |
| 7   | C <sub>8</sub> H <sub>17</sub>  | 1.51387          | 1.51067 | 1.50751 | 1.50435 | 1.50115 | 1.49802 | 1.49508 |
| 8   | C <sub>9</sub> H <sub>19</sub>  | 1.50879          | 1.50565 | 1.50211 | 1.49856 | 1.49534 | 1.49275 | 1.48975 |
| 9   | C <sub>10</sub> H <sub>21</sub> | 1.51322          | 1.50997 | 1.50619 | 1.50166 | 1.49903 | 1.49610 | 1.49386 |
| 10  | C <sub>11</sub> H <sub>23</sub> | 1.50711          | 1.50377 | 1.5003  | 1.49653 | 1.49354 | 1.49114 | 1.48864 |
